# Supplementary material for: The role of atomic carbon in directing electrochemical CO (2) reduction to multicarbon products
Source: Royal Society of Chemistry journal article supplement (doi:10.1039/d0ee02826f), 2020-11-23
Supplement: d0ee02826f1.pdf [file d0ee02826f1.pdf]

## 1. Supplementary Note: Calculation Details and Simplification/Assumption

### Supplementary Note 1: General calculation details for the adsorption energies

Reaction energetics were calculated with density functional theory (DFT) with a periodic plane-wave implementation and ultrasoft pseudopotentials using the QUANTUM ESPRESSO code,<sup>1</sup> interfaced with the Atomistic Simulation Environment (ASE).<sup>2</sup> We applied the BEEF-vdW functional, which provides a reasonable description of van der Waals forces while maintaining an accurate prediction of chemisorption energies.<sup>3</sup> Plane-wave and density cutoffs were 500 and 5000 eV, respectively, with a Fermi-level smearing width of 0.1 eV. psLib ultrasoft pseudopotentials were chosen. The adsorption energies on (111) and (100) surfaces of *fcc* transition metals were evaluated using four-layer ( $3 \times 3$ ) supercells with the bottom two layers constrained and a vacuum layer of 20 Å, and [ $4 \times 4 \times 1$ ] Monkhorst-Pack *k*-point grids<sup>4</sup> were used. The simulation of (211) surfaces of *fcc* transition metals followed the same calculation settings but on four-layer ( $1 \times 3$ ) supercells. ( $3 \times 1$ ) supercells were also used to model Cu(310) and Cu(511) and Monkhorst-Pack *k*-point grids are [ $3 \times 6 \times 1$ ] and [ $4 \times 4 \times 1$ ], respectively.

All the cell sizes and corresponding Monkhorst-Pack *k*-point grids for other Cu facets and intermetallic surfaces could be found in **Table S1**.

**Table S1. Computational details for materials and surfaces shown in the ( $G_{CO^*}$ ,  $G_{C^*}$ ) selectivity maps.**

| Materials                      | Surfaces                                           | Unit cell size                   | Monkhorst-Pack <i>k</i> -point grids |
|--------------------------------|----------------------------------------------------|----------------------------------|--------------------------------------|
| Various Cu                     | (110)                                              | ( $2 \times 3$ )                 | [ $4 \times 4 \times 1$ ]            |
|                                | (711)                                              | ( $3 \times 1$ )                 | [ $4 \times 3 \times 1$ ]            |
|                                | (521)                                              | ( $2 \times 1$ )                 | [ $4 \times 4 \times 1$ ]            |
|                                | (621)                                              | ( $2 \times 1$ )                 | [ $3 \times 4 \times 1$ ]            |
|                                | (653)                                              | ( $1 \times 1$ )                 | [ $4 \times 3 \times 1$ ]            |
|                                | (111)-SV (1/9 single vacancy in the top layer)     | ( $3 \times 3$ )                 | [ $4 \times 4 \times 1$ ]            |
| L1 <sub>2</sub> intermetallics | A <sub>3</sub> B (100) with AB surface termination | ( $2\sqrt{2} \times 2\sqrt{2}$ ) | [ $4 \times 4 \times 1$ ]            |
| L1 <sub>0</sub> intermetallics | AB (100) with AB surface termination               | ( $2\sqrt{2} \times 2\sqrt{2}$ ) | [ $4 \times 4 \times 1$ ]            |
| Ni-Ga                          | Ni <sub>3</sub> Ga (100)                           | ( $3\sqrt{2} \times 3\sqrt{2}$ ) | [ $4 \times 4 \times 1$ ]            |
|                                | Ni <sub>5</sub> Ga <sub>3</sub> (100)              | ( $2\sqrt{2} \times 2\sqrt{2}$ ) | [ $4 \times 4 \times 1$ ]            |
|                                | Ni <sub>5</sub> Ga <sub>3</sub> (221)              | ( $1 \times 1$ )                 | [ $4 \times 4 \times 1$ ]            |
|                                | Ni <sub>5</sub> Ga <sub>3</sub> (111)              | ( $2 \times 1$ )                 | [ $4 \times 4 \times 1$ ]            |

All the surfaces have four layers with the top two layers relaxed. (100) surface orientations were selected due to the uniqueness of four-fold hollow site in stabilizing the C\* intermediate compared to corresponding three-fold hollow site. The AB-type surface terminations for L1<sub>2</sub> and L1<sub>0</sub> intermetallics were selected due to the relatively low surface energy as shown in **Figure S1**.

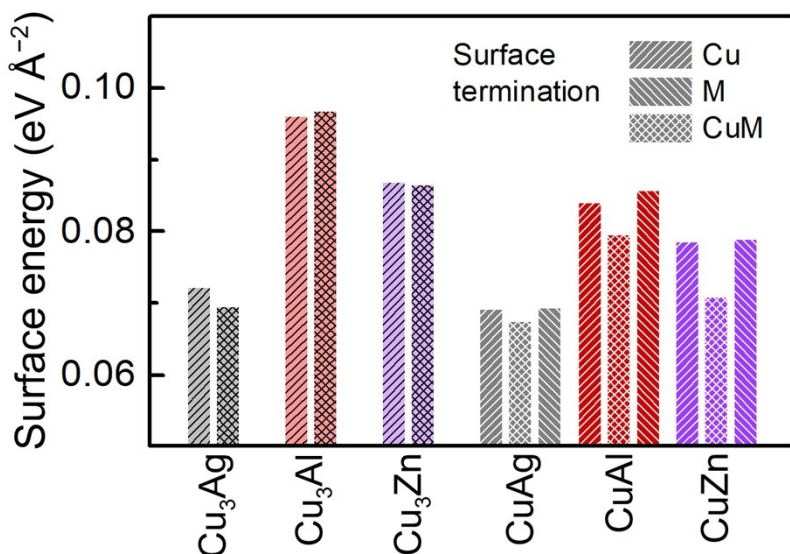

**Figure S1. Surface energies of Cu-based intermetallics.**

For a given slab exposed at the (hkl) plane with  $n$  atoms, its surface energy  $\gamma$  is given by  $\gamma^{\text{hkl}} = (E_{\text{slab}}^{\text{hkl}} - E_{\text{bulk}} n_{\text{slab}}) / (2A_{\text{slab}}^{\text{hkl}})$  where  $A_{\text{slab}}^{\text{hkl}}$  is the cross-sectional area of the slab's unit cell,  $n_{\text{slab}}$  the number of atoms in the slab,  $E_{\text{slab}}^{\text{hkl}}$  the energy of the slab itself, and  $E_{\text{bulk}}$  the energy of the optimized bulk structure per atom. Pure Cu and half Cu half M (CuM) surface terminations were considered for  $L1_2 A_3B$  intermetallics while pure Cu, pure M and CuM surface terminations were considered for  $L1_0 A_3B$  intermetallics. The Ni-rich surface terminations were selected for Ni-Ga systems based on the previous works considering both the surface energy and the CO adsorption.<sup>5,6</sup>

All structures were optimized until the force components were less than  $0.05 \text{ eV \AA}^{-1}$ . A dipole correction was applied to decouple the electrostatic interaction between the periodically repeated slabs.

### Supplementary Note 2: Gibbs free energy correction

To directly obtain the reaction energies  $\Delta G_{\text{rxn}}$  from energetic scaling relationship and use them for the selectivity maps, we used adsorption free energies,  $G$ , instead of electronic energies to construct those scaling relationships. Thus,  $G$  is affected by the selected gas-phase free energies as the references. Here we made the same assumption as Peterson et al. did in 2010<sup>7</sup> that gaseous products in the pathway were calculated at partial pressures corresponding to the Faradaic yields reported by Hori et al.<sup>8</sup> The fugacities we used are the same as in Ref.<sup>7</sup>. Therefore, the contribution to the chemical potential  $\mu$  of gas-phase molecules could be found in **Table S2**.

**Table S2. Gas-phase free energy correction.** Assumed fugacity for each non-adsorbate species, along with calculated electronic energies ( $E_{\text{raw}}$ ), DFT correction ( $E_{\text{BEEF-vdW}}$ ), corrected electronic energies ( $E_{\text{ele}} = E_{\text{raw}} + E_{\text{BEEF-vdW}}$ ), zero point energies (ZPE), enthalpic temperature correction, entropy contribution ( $-TS$ ), chemical potential ( $\mu = E_{\text{ele}} + \text{ZPE} + \int C_p dT - TS$ ), and the total correction ( $\mu - E_{\text{ele}} = \text{ZPE} + \int C_p dT - TS$ ).  $\text{H}_2$  is the value used for gaseous hydrogen,  $\text{H}_2$  (ref) is used for the computational hydrogen electrode.

| Species                | Fugacity (Pa) | $E_{\text{raw}}$ (eV) | $E_{\text{BEEF-vdW}}$ (eV) | $E_{\text{ele}}$ (eV) | ZPE (eV) | $\int C_p dT$ (eV) | $-TS$ (eV) | $\mu$ (eV) | $\mu - E_{\text{ele}}$ (eV) |
|------------------------|---------------|-----------------------|----------------------------|-----------------------|----------|--------------------|------------|------------|-----------------------------|
| CO                     | 5562          | 0.00                  |                            | 0.00                  | 0.13     | 0.09               | -0.67      | -0.45      | -0.45                       |
| $\text{H}_2$           | 30296         | -0.09                 | 0.09                       | 0.00                  | 0.27     | 0.09               | -0.44      | -0.07      | -0.07                       |
| $\text{CH}_4$          | 20467         | -2.80                 |                            | -2.80                 | 1.20     | 0.11               | -0.67      | -2.16      | 0.64                        |
| $\text{C}_2\text{H}_4$ | 13942         | -3.14                 |                            | -3.14                 | 1.37     | 0.12               | -0.74      | -2.39      | 0.75                        |
| $\text{H}_2\text{O}$   | 3534          | 0.00                  |                            | 0.00                  | 0.57     | 0.10               | -0.67      | 0.00       | 0.00                        |
| $\text{H}_2$ (ref)     | 101325        | -0.09                 | 0.09                       | 0.00                  | 0.27     | 0.09               | -0.41      | -0.04      | -0.04                       |

$E_{\text{ele}}$  and  $\mu$  are referenced to the gas-phase electronic energy of CO,  $\text{H}_2\text{O}$ , and  $\text{H}_2$  (ref) and  $\mu$  is different from the free energy change ( $G$ , referenced to the gas-phase free energy) shown in **Figure 6**, **Figures S18–S22**, and **Table S9**. For example,  $\mu_{\text{CH}_4} = E_{\text{ele\_CH}_4} + (\text{ZPE} + \int C_p dT - TS)_{\text{CH}_4}$  while  $G_{\text{CH}_4} = \mu_{\text{CH}_4} - (\mu_{\text{CO}} + 2 \times \mu_{\text{H}_2(\text{ref})} - \mu_{\text{H}_2\text{O}})$ .

Similarly, the free energy correction to the adsorbates could be found in **Table S3**. Modes of vibration were found by performing a normal-mode analysis; all vibrations were treated in the harmonic oscillator approximation. All vibrations used for free energy correction were obtained on Cu.

**Table S3. Adsorbate free energy correction.** Contributions to the adsorbate free energy from the ZPE correction, enthalpic temperature correction, entropy, and the total free energy correction, respectively.

| Adsorbates       | ZPE (eV) | $\int C_p dT$ (eV) | $-TS$ (eV) | $\mu - E_{\text{ele}}$ (eV) |
|------------------|----------|--------------------|------------|-----------------------------|
| $\text{CO}^*$    | 0.17     | 0.07               | -0.16      | 0.09                        |
| $\text{CHO}^*$   | 0.44     | 0.09               | -0.22      | 0.32                        |
| $\text{COH}^*$   | 0.46     | 0.09               | -0.17      | 0.37                        |
| $\text{C}^*$     | 0.09     | 0.02               | -0.03      | 0.08                        |
| $\text{CHOH}^*$  | 0.76     | 0.09               | -0.18      | 0.68                        |
| $\text{CH}^*$    | 0.34     | 0.03               | -0.05      | 0.33                        |
| $\text{CH}_2^*$  | 0.59     | 0.06               | -0.10      | 0.55                        |
| $\text{CH}_3^*$  | 0.91     | 0.08               | -0.15      | 0.84                        |
| $\text{OCCO}^*$  | 0.42     | 0.10               | -0.18      | 0.35                        |
| $\text{OCCOH}^*$ | 0.72     | 0.11               | -0.19      | 0.65                        |
| $\text{OCCHO}^*$ | 0.64     | 0.09               | -0.16      | 0.57                        |
| $\text{CCO}^*$   | 0.33     | 0.09               | -0.15      | 0.27                        |
| $\text{CHCO}^*$  | 0.60     | 0.09               | -0.22      | 0.47                        |
| $\text{H}^*$     | 0.13     | 0.01               | -0.02      | 0.12                        |

|     |      |      |       |      |
|-----|------|------|-------|------|
| OH* | 0.32 | 0.07 | -0.15 | 0.24 |
|-----|------|------|-------|------|

The ZPE shown in **Table S3** is only for Cu(100). Considering that  $G_{\text{CO}^*}$  is one of the two descriptors, the ZPE used for correcting the CO adsorption free energies on various metals and different sites was replaced by the corresponding value shown in **Table S8 (see details in CO overbinding corrections)**.

### Supplementary Note 3: Solvation correction

According to previous analysis,<sup>9, 10</sup> the solvation corrections ( $E_{\text{solv corr}}$ ) to CO\*, CHO\*, COH\*, CHOH\*, OCCO\*, OCCOH\*, OCCHO\*, CCO\*, and CHCO\* are summarized in **Table S4**. The binding energy after solvation correction  $\Delta E_{\text{solv}} = \Delta E_{\text{vacuum}} - E_{\text{solv corr}}$ , where  $\Delta E_{\text{vacuum}}$  is the adsorption energy calculated without explicit solvents (in vacuum),  $E_{\text{solv corr}}$  is the energetic correction listed in **Table S4**, and  $\Delta E_{\text{solv}}$  is the solvation-corrected adsorption energy used in this work. The solvation correction for CHOH\* is assumed to be the same as COH\*; the solvation correction for OCCOH\* is estimated from the that for OCCO\* and the difference between CO\* and COH\*.

**Table S4. Solvation corrections.**

| Adsorbates         | $E_{\text{solv corr}}$ (eV) | Adsorbates           | $E_{\text{solv corr}}$ (eV) |
|--------------------|-----------------------------|----------------------|-----------------------------|
| CO* <sup>10</sup>  | -0.06                       | OCCO* <sup>10</sup>  | -0.25                       |
| CHO* <sup>10</sup> | -0.11                       | OCCOH*               | -0.30                       |
| COH* <sup>10</sup> | -0.11                       | OCCHO* <sup>10</sup> | -0.30                       |
| C*                 | 0                           | CCO* <sup>9</sup>    | -0.10                       |
| CHOH*              | -0.11                       | CHCO* <sup>9</sup>   | -0.10                       |
| CH*                | 0                           | H*                   | 0                           |
| CH <sub>2</sub> *  | 0                           | OH*                  | 0                           |
| CH <sub>3</sub> *  | 0                           | CO <sub>HP}</sub>    | 0                           |

HP: Helmholtz plane;

### Supplementary Note 4: Interface electric field model and field correction

Cation-induced fields lead to dramatic stabilizations of the C<sub>2</sub> species involved.<sup>11</sup> The more degrees of freedom in the solvent in the presence of cations and solvent rearrangement in the presence of bulkier C<sub>2</sub> intermediates, however, leads to higher uncertainties in the energetics. It has been suggested previously that the stabilization brought by solvation and cation-induced fields can roughly be divided,<sup>11</sup> and therefore we consider those two effects separately. We firstly obtained the field-stabilized adsorbate structures in the presence of a hydronium (H<sub>3</sub>O<sup>+</sup>) ion. We then applied a sawtooth potential in the *z*-direction for structures of the adsorbates in vacuum, where the solvent layer was removed. The interaction energy between the adsorbate and the interfacial field can be described by

$$\Delta\Delta E = \mu\varepsilon - \frac{1}{2}\alpha\varepsilon^2 + \dots \quad (1)$$

where  $\Delta\Delta E$  is the change in binding energy  $\Delta E$ ,  $\varepsilon$  is the electric field strength, and  $\mu$  and  $\alpha$  are the intrinsic dipole moment and polarizability of the adsorbate, respectively.<sup>12</sup> The

parameters  $\mu$  and  $\alpha$  of the key intermediates are shown in **Table S5**. Note that  $\mu$  and  $\alpha$  of  $\text{OCCHO}^*$  and  $\text{OC-CHO}^{\text{TS}}$  are adopted from the data shown in Ref.<sup>13</sup> to justify the contribution of  $\text{OC-CHO}$  coupling to  $\text{C}_{2+}$  formation.

**Table S5. Parameters that describe the field effect on adsorption energies.**

| Species                                    | $\text{CO}_{\text{HP}}$ | $\text{CO}^*$    | $\text{COH}^*$ | $\text{C}^*$   | $\text{CH}^*$           |                          |
|--------------------------------------------|-------------------------|------------------|----------------|----------------|-------------------------|--------------------------|
| $\mu$ ( $e\text{\AA}$ )                    | 0.0357                  | 0.0440           | -0.125         | 0.135          | -0.00870                |                          |
| $\alpha$ ( $e\text{\AA}^2 \text{V}^{-1}$ ) | 0.254                   | 0.302            | 0.514          | -0.0752        | 0.0340                  |                          |
| Species                                    | $\text{OCCO}^*$         | $\text{OCCOH}^*$ | TS: C-CO       | $\text{CCO}^*$ | $\text{OCCHO}^*{}^{13}$ | TS: $\text{OC-CHO}^{13}$ |
| $\mu$ ( $e\text{\AA}$ )                    | 0.672                   | 0.239            | 0.225          | 0.421          | 1.038                   | 0.759                    |
| $\alpha$ ( $e\text{\AA}^2 \text{V}^{-1}$ ) | 0.466                   | 0.652            | 0.612          | 0.451          | 0.423                   | 0.295                    |

Note:  $\text{CO}_{\text{HP}}$ : CO in the Helmholtz plane;  $\text{CH}^*$  is insensitive to the field and thus not considered for the field correction.

The field dependence of key intermediates is shown in **Figure S2a, b** using the above parameters of  $\mu$  and  $\alpha$  and Eq. (1).

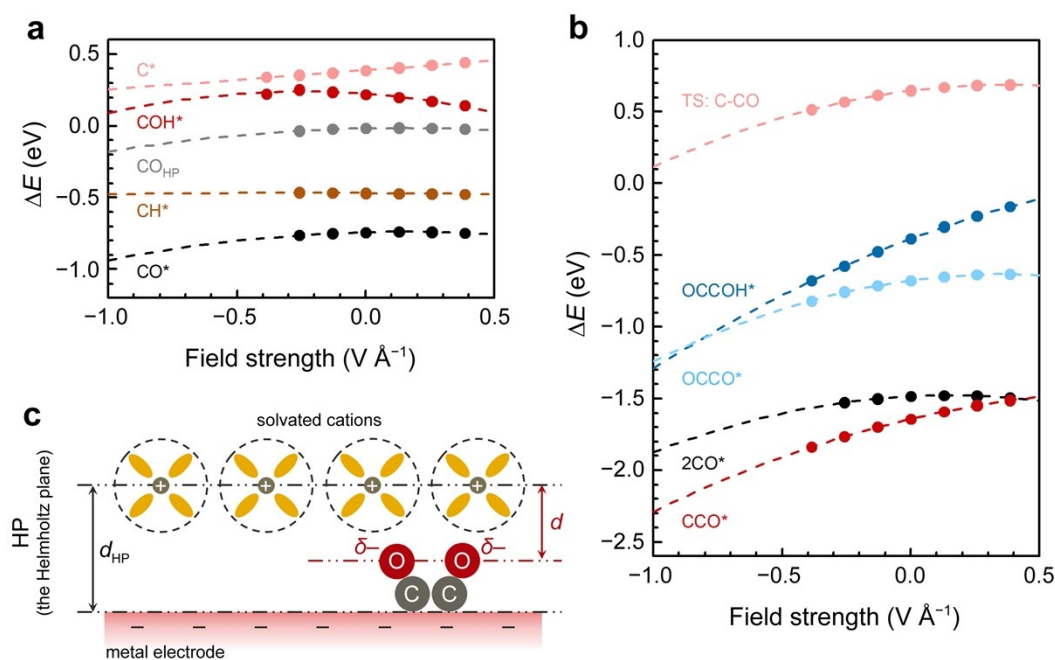

**Figure S2. Field effect on energetics of key intermediates.** Electronic adsorption energies of key (a)  $\text{C}_1$  and (b)  $\text{C}_2$  intermediates under various field strengths. These energies were corrected after solvation correction. All energetics were obtained on a  $(3 \times 3 \times 4)$   $\text{Cu}(100)$  slab. (c) Schematic illustration of decreased  $d$  with respect to the usual thickness of the Helmholtz plane ( $d_{\text{HP}}$ ) when negative charge is transferred to surface-bound key intermediates such as the  $\text{O}^{\delta-}\text{-CCO}^{\delta-}$  dimer. By applying the estimated  $d$  of  $1.2 \text{ \AA}$ , the simple double layer capacitor model results in comparable adsorption energies of key species to those obtained with a more sophisticated model recently developed by Chan et al.<sup>14</sup>

Then, it is important to correlate the interfacial electric field strength to the applied potential for the Cu(100) electrode. According to the classical double layer theory,<sup>15</sup> the electric field strength  $\varepsilon$  is derived from

$$\varepsilon = \frac{\Phi_M - \Phi_{M, PZC}}{d} \quad (2)$$

where  $\Phi_M$  and  $\Phi_{M, PZC}$  are applied potential of a metal electrode and the zero-charge potential of this metal electrode, respectively, and  $d$  is the distance between the positively (*i.e.* the center of the Helmholtz plane) and negatively charged planes.  $\Phi_{M, PZC}$  approximates the electrolyte potential at the Helmholtz plane ( $\Phi_{HP}$ ), and the potential difference  $\Phi_M - \Phi_{HP}$  is defined as the driving force for the interfacial charge transfer that builds the electric field.<sup>16</sup> Eq. (2) explicitly introduces the potential dependence of  $\varepsilon$ . Herein experimentally measured  $\Phi_{M, PZC} = -0.54$  V vs. the standard hydrogen electrode (SHE) for Cu(100)<sup>14, 17</sup> and  $d = 1.2$  Å were employed in our simulation. Note that  $d = 1.2$  Å is smaller than the usually simulated thickness (ca. 3–4 Å) of the Helmholtz plane.<sup>14, 18</sup> **Figure S2c** depicts the decreased  $d$  with negative charge transferred to surface-bound key intermediates such as the  $O^{\delta-}CCO^{\delta-}$  dimer.

Despite the above estimation of  $d$ , our model shows reasonable agreement of the binding energy of OCCO\* on Cu(100) at  $-1.0$  V vs. RHE (pH = 7) with the value reported by Chan et al. employing a combined multiscale *ab initio*/continuum model that describes the effect of surface charge density  $\sigma$  and electric field more strictly (**Figure S3**).<sup>14</sup>

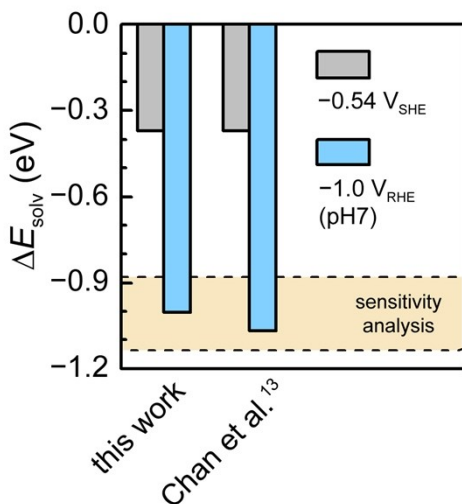

**Figure S3. Comparison between OCCO\* adsorption energies on Cu(100) using different methods.** OCCO\* is regarded as the most important intermediate in the OCCOH pathway and is very sensitive to field. The OCCO\* adsorption energies used in this work, derived through the field model described by Eq. (1), are compared to the reported values by Chan et al. using a multiscale *ab initio*/continuum model using surface charge density  $\sigma$  as a descriptor.<sup>14</sup>

As reported in Ref.<sup>14</sup>, the OCCO\* adsorption energies on Cu(100) are given as  $\Delta E = -0.37 + 0.0393\sigma - 0.00025\sigma^2$  and  $\sigma$  was estimated to be  $-18 \mu C cm^{-2}$  at  $U_{RHE} = -1.0$  V in a  $K^+$ -based neutral electrolyte (*i.e.*, the similar system as the experimentally tested  $KHCO_3$  electrolyte at pH = 6.8 and the pH = 7 microkinetic model in this work). The

comparison shows reasonable agreement in the OCCO\* adsorption energies between our simplified field model and higher-level  $\sigma$ -based simulations within the range of DFT error.<sup>14, 19</sup> Sensitivity analysis was performed by varying  $d$  from 1.0 to 1.4 Å and the induced difference in binding energies is also within the range of DFT error. Similar sensitivity analysis was also performed in **Figure S10**. Thus we believe that our treatment of the field effect will not induce strong deviation from the results obtained through higher-level  $\sigma$ -based simulations.

With including the above  $U_{\text{SHE}}$ -dependent field effect and the computational hydrogen electrode (CHE) model<sup>20</sup> that brings in energetic correction to electrons at a  $U_{\text{RHE}}$  scale, the electronic adsorption energy of a certain specie at a given  $U_{\text{SHE/RHE}}$  is given by

$$\Delta E_{\text{ads}}^{U_{\text{SHE/RHE}}} = \Delta E_{\text{ads}}^{U_{\text{RHE}}=0} + neU_{\text{RHE}} + \frac{\mu}{d}(U_{\text{SHE}} - U_{\text{M, PZC}}) - \frac{1}{2d^2}(U_{\text{SHE}} - U_{\text{M, PZC}})^2 \quad (3)$$

( $U_{\text{RHE}}$  scale) ( $U_{\text{SHE}}$  scale)

where  $\Delta E_{\text{ads}}^{U_{\text{RHE}}=0}$  is the adsorption energy at  $U_{\text{RHE}} = 0$  V (referenced to gas-phase CO, H<sub>2</sub>O, and H<sub>2</sub>),  $n$  is the number of transferred electron,  $U_{\text{M, PZC}} = -0.54$  V vs. SHE for Cu(100), while  $U_{\text{SHE}}$  and  $U_{\text{RHE}}$  are correlated through the pH of the bulk electrolyte

$$U_{\text{RHE}} = U_{\text{SHE}} + 0.059\text{pH} \quad (4)$$

Note that the  $U_{\text{SHE}}$ -scale term in Eq. (3) is only applied to field-sensitive species as shown in **Figure S3** and other species follow the  $U_{\text{RHE}}$ -scale dependency. Lastly, we added the solvation corrections as described above to obtain the adsorption energies. The obtained adsorption energies used for microkinetic modeling are shown in **Table S6**.

**Table S6. Electronic energies  $E_{\text{ads}}^{U_{\text{RHE}}=0}$  and chemical potentials  $\mu_{\text{ads}}^{U_{\text{RHE}}=0}$  of species involved in the microkinetic modeling on Cu(100).**

| Conditions<br>Adsorbates | vacuum                                      |                                             | solv                                          |                                               | field correction applied?<br>(yes or no) |
|--------------------------|---------------------------------------------|---------------------------------------------|-----------------------------------------------|-----------------------------------------------|------------------------------------------|
|                          | $E_{\text{ads}}^{U_{\text{RHE}}=0}$<br>(eV) | $E_{\text{ads}}^{U_{\text{RHE}}=0}$<br>(eV) | $\mu_{\text{ads}}^{U_{\text{RHE}}=0}$<br>(eV) | $\mu_{\text{ads}}^{U_{\text{RHE}}=0}$<br>(eV) |                                          |
| CO*                      | -0.65                                       | -0.71                                       | -0.62                                         | -0.62                                         | yes                                      |
| CHO*                     | 0.01                                        | -0.10                                       | 0.22                                          | 0.22                                          | no                                       |
| COH*                     | 0.34                                        | 0.23                                        | 0.60                                          | 0.60                                          | yes                                      |
| C*                       | 0.38                                        | 0.38                                        | 0.46                                          | 0.46                                          | yes                                      |
| CHOH*                    | 0.03                                        | -0.08                                       | 0.60                                          | 0.60                                          | no                                       |
| CH*                      | -0.47                                       | -0.47                                       | -0.14                                         | -0.14                                         | no                                       |
| CH <sub>2</sub> *        | -0.60                                       | -0.60                                       | -0.05                                         | -0.05                                         | no                                       |
| CH <sub>3</sub> *        | -1.68                                       | -1.68                                       | -0.84                                         | -0.84                                         | no                                       |
| OCCO*                    | -0.12                                       | -0.37                                       | -0.02                                         | -0.02                                         | yes                                      |
| OCCOH*                   | -0.38                                       | -0.68                                       | -0.03                                         | -0.03                                         | yes                                      |
| OCCHO*                   | -0.06                                       | -0.36                                       | 0.21                                          | 0.21                                          | yes                                      |
| CCO*                     | -1.62                                       | -1.72                                       | -1.45                                         | -1.45                                         | yes                                      |
| CHCO*                    | -1.75                                       | -1.85                                       | -1.38                                         | -1.38                                         | no                                       |
| H*                       | 0.07                                        | 0.07                                        | 0.19                                          | 0.19                                          | no                                       |

|                  |       |       |       |            |
|------------------|-------|-------|-------|------------|
| OH*              | -0.04 | -0.04 | 0.20  | <i>no</i>  |
| CO <sub>HP</sub> | 0.00  | 0.00  | -0.45 | <i>yes</i> |

Note: CO<sub>HP</sub>: CO in the Helmholtz plane

Ongoing efforts will evaluate the energetics more rigorously by minima hopping<sup>11, 21</sup> the cation/solvent structures in the presence of the various intermediates. This method has been well adopted in previous works.<sup>9, 13, 22, 23</sup>

### Supplementary Note 5: Electrochemical barriers and hydronium vs. water as the hydrogen source for proton transfer

Electrochemical barriers were calculated with (3 × 3) and (4 × 3) supercells and Monkhorst-Pack k-point grids of [4 × 4 × 1] and [3 × 4 × 1], respectively. All structures contained a three-layer transition metal slab, with atoms in the top layer relaxed and the rest fixed, along with a hydrogen-bonded water layer determined through minima hopping.<sup>11</sup> Transition state (TS) geometries and energies were calculated using the climbing-image nudged elastic band (CI-NEB) method, with the forces on the climbing image converged to less than 0.05 eV Å<sup>-1</sup>.<sup>24</sup> The spring constants were tightened for images close to the saddle point.<sup>25</sup> The plane wave and charge density cutoff, exchange-correlation functional, and other parameters were the same as those used for geometry optimizations. The charge extrapolation method<sup>26, 27</sup> was used to deduce the activation barriers at constant potential.<sup>28</sup> A H<sub>3</sub>O<sup>+</sup> ion was present in the initial state (IS) to act as the hydrogen source for protonation. Later on, we will introduce an approach to estimate alkaline protonation barriers (water as the hydrogen source) from the barriers obtained under acidic conditions (H<sub>3</sub>O<sup>+</sup>).

We note that all of the reported barriers are acidic barriers, *i.e.*, H<sub>3</sub>O<sup>+</sup> as the hydrogen source. However, at neutral and alkaline conditions, the concentration of H<sub>3</sub>O<sup>+</sup> is lower than 10<sup>-7</sup> M in the aqueous solution at room temperature. Recent experimental and theoretical works also showed that water should be the dominant hydrogen source for protonation at neutral and alkaline conditions.<sup>29, 30</sup> The difficulties in obtaining alkaline electrochemical barriers through DFT computation have been discussed in details in previous works.<sup>9, 30</sup> Taking these difficulties into consideration, we therefore estimated alkaline barriers from the acidic ones based on the following analysis regarding pH effects on the IS/FS energies and the choice of potential scales of RHE/SHE.

According to previous studies of a protonation reaction,<sup>9, 31</sup> the pH affects the chemical potential of OH<sup>-</sup> and H<sub>3</sub>O<sup>+</sup> through their configurational entropies, while the absolute potential (*i.e.*  $U_{\text{SHE}}$ ) affects the chemical potential of the electron,  $e^-$ . As the TS is assumed to have no entropic contributions, its energy only depends on potential via the fractional and pH-independent transfer coefficient  $\alpha$ . In the case of H<sub>3</sub>O<sup>+</sup> as the hydrogen source,

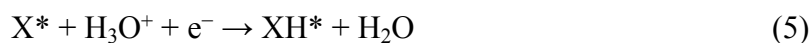

the activation energy and the reaction energy can be expressed as

$$\Delta G_a^{\text{H}_3\text{O}^+} = \mu_{\text{TS}} + \mu_{ae^-, U} - \left( \mu_{\text{H}_3\text{O}^+} + \mu_{e^-, U} + \mu_{\text{X}^*} \right)$$



$$= \mu_{\text{TS}} + (\mu_{ae^-,0} - \alpha e U_{\text{SHE}}) - \left( \mu_{\text{H}_3\text{O}^+}^0 - 2.3k_{\text{B}}T\text{pH} \right) + \left( \mu_{e^-,0} - e U_{\text{SHE}} \right) + \mu_{\text{X}^*}$$

$$= \Delta G_{a,0}^{\text{H}_3\text{O}^+} + \beta e U_{\text{SHE}} + 2.3k_{\text{B}}T\text{pH} \quad (6)$$

$$= \Delta G_{a,0}^{\text{H}_3\text{O}^+} + \beta e U_{\text{RHE}} + (1 - \beta)2.3k_{\text{B}}T\text{pH} \quad (7)$$

$$\begin{aligned} \Delta G_{\text{H}_3\text{O}^+}^{\text{H}_3\text{O}^+} &= \mu_{\text{XH}^*} + \mu_{\text{H}_2\text{O}} - \left( \mu_{\text{H}_3\text{O}^+} + \mu_{e^-,U} + \mu_{\text{X}^*} \right) \\ &= \mu_{\text{XH}^*} + \mu_{\text{H}_2\text{O}} + \left( \mu_{\text{H}_3\text{O}^+}^0 - 2.3k_{\text{B}}T\text{pH} \right) + \left( \mu_{e^-,0} - e U_{\text{SHE}} \right) + \mu_{\text{X}^*} \end{aligned}$$

$$= \Delta G_0^{\text{H}_3\text{O}^+} + e U_{\text{SHE}} + 2.3k_{\text{B}}T\text{pH} \quad (8)$$

$$= \Delta G_0^{\text{H}_3\text{O}^+} + e U_{\text{RHE}} \quad (9)$$

In the case of water as the hydrogen source,

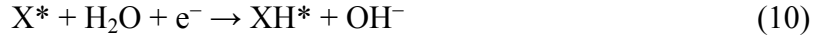

the activation energy and the reaction energy can be expressed as

$$\begin{aligned} \Delta G_a^{\text{H}_2\text{O}} &= \mu_{\text{TS}} + \mu_{ae^-,U} - \left( \mu_{\text{H}_2\text{O}} + \mu_{e^-,U} + \mu_{\text{X}^*} \right) \\ &= \mu_{\text{TS}} + (\mu_{ae^-,0} - \alpha e U_{\text{SHE}}) - \left( \mu_{\text{H}_2\text{O}} + (\mu_{e^-,0} - e U_{\text{SHE}}) + \mu_{\text{X}^*} \right) \\ &= \Delta G_{a,0}^{\text{H}_2\text{O}} + \beta e U_{\text{SHE}} \quad (11) \end{aligned}$$

$$= \Delta G_{a,0}^{\text{H}_2\text{O}} + \beta e U_{\text{RHE}} - \beta 2.3k_{\text{B}}T\text{pH} \quad (12)$$

$$\begin{aligned} \Delta G_{\text{H}_2\text{O}}^{\text{H}_2\text{O}} &= \mu_{\text{XH}^*} + \mu_{\text{OH}^-} - \left( \mu_{\text{H}_2\text{O}} + \mu_{e^-,U} + \mu_{\text{X}^*} \right) \\ &= \mu_{\text{XH}^*} + (\mu_{\text{OH}^-}^0 - 2.3k_{\text{B}}T(14 - \text{pH})) - \left( \mu_{\text{H}_2\text{O}} + (\mu_{e^-,0} - e U_{\text{SHE}}) + \mu_{\text{X}^*} \right) \end{aligned}$$

$$= \Delta G_0^{\text{H}_2\text{O}} + e U_{\text{SHE}} + 2.3k_{\text{B}}T\text{pH} \quad (13)$$

$$= \Delta G_0^{\text{H}_2\text{O}} + e U_{\text{RHE}} \quad (14)$$

where  $\mu_{\text{OH}^-}^0$  and  $\mu_{\text{H}_3\text{O}^+}^0$  denote the chemical potentials under the standard conditions,  $\mu_{\text{X}^*}$  and  $\mu_{\text{XH}^*}$  the chemical potential of species  $\text{X}^*$  and  $\text{XH}^*$ ,  $\Delta G_{a,0}^{\text{H}_2\text{O}} / \Delta G_0^{\text{H}_2\text{O}}$  the activation energy and reaction energy at 0 V using water as the hydrogen source,  $\Delta G_a^{\text{H}_3\text{O}^+} / \Delta G_0^{\text{H}_3\text{O}^+}$  the activation energy and reaction energy at 0 V using  $\text{H}_3\text{O}^+$  as the hydrogen source,  $\alpha$  the charge in the TS that gives the potential dependence ( $\beta = 1 - \alpha$ ),  $T$  the temperature and  $k_{\text{B}}$  the Boltzmann constant.

According to the equations above, the activation energies and reaction energies of acidic and alkaline protonation reactions can be schematically illustrated as in **Figure S4** at different potential scales. Eq. (6) and Eq. (11) show that the acidic barrier is dependent on

both pH and absolute potential while the alkaline barrier only depends on the absolute potential; Eq. (9) and Eq. (14) express that the reaction energies of both acidic and alkaline protonation reactions are  $U_{\text{RHE}}$ -dependent. On the SHE scale, an increased pH leads to an increased acidic barrier by an amount of  $2.3k_{\text{B}}T\Delta\text{pH}$ , while the alkaline barrier is unaffected by pH. While in RHE scale, since shifts in pH are by definition balanced by shifts in absolute potential (i.e.  $2.3k_{\text{B}}T\Delta\text{pH} = -e\Delta U$ ), an increased pH will lead to an increase in acidic barriers by an amount of  $(1 - \beta)2.3k_{\text{B}}T\Delta\text{pH}$  and a decrease in barriers from water by an amount of  $\beta 2.3k_{\text{B}}T\Delta\text{pH}$ .

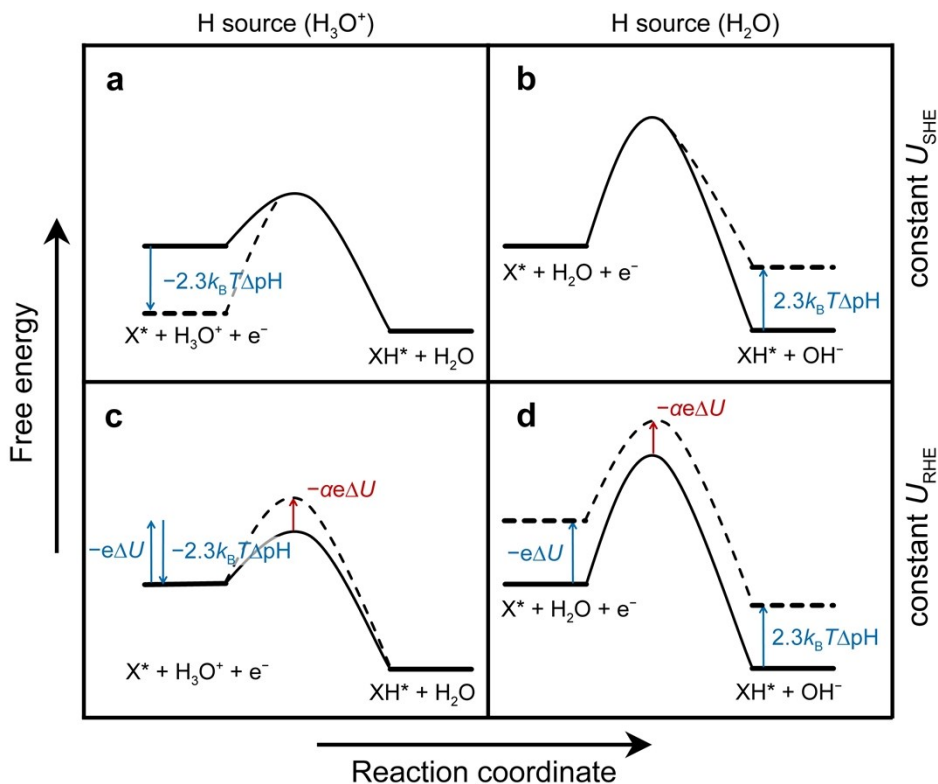

**Figure S4. The effects of  $\text{H}_3\text{O}^+$  and  $\text{H}_2\text{O}$  as hydrogen sources on activation/reaction energies of a protonation reaction.** Free energy profiles of (a) acidic protonation with  $\text{H}_3\text{O}^+$  as the hydrogen source and (b) alkaline protonation with  $\text{H}_2\text{O}$  as the hydrogen source at a constant absolute potential of  $U_{\text{SHE}}$ . Free energy profiles of (c) acidic protonation with  $\text{H}_3\text{O}^+$  as the hydrogen source and (d) alkaline protonation with  $\text{H}_2\text{O}$  as the hydrogen source at the same potential of  $U_{\text{RHE}}$ . pH increases from solid profile to dashed profile in each panel. The schematic illustration was conceptualized for the Volmer reaction in Ref.<sup>31</sup>.

To correlate the acidic and alkaline barriers using different hydrogen sources, we firstly extrapolated the barriers to a work function of 4.4 eV, which corresponds to 0 V vs. SHE. All TSs were referenced to the IS of aqueous protons and electrons in bulk solution, as determined using the CHE.<sup>20</sup>

According to previous study by Liu et al.,<sup>9</sup> there is an energetic difference between the

acidic barrier at 0 V vs. RHE at  $\text{pH} = 0$  ( $\Delta G_{\text{a}, 0 \text{ V}_{\text{RHE}}, \text{pH}0}^{\text{H}_3\text{O}^+}$ , also equivalent to  $\Delta G_{\text{a}, 0 \text{ V}_{\text{SHE}}, \text{pH}0}^{\text{H}_3\text{O}^+}$ ) and

the alkaline barrier at 0 V vs. RHE at pH = 14 ( $\Delta G_{a,0 \text{ V}_{\text{RHE}}, \text{pH}14}^{\text{H}_2\text{O}}$ ) for the Volmer and Heyrovsky reactions (Supplementary Table 3 in Ref.<sup>9</sup>). We therefore refer such an energetic difference as “alkaline barrier correction” as determined by

$$\Delta\Delta G_{\text{alkaline corr}} = \Delta G_{a,0 \text{ V}_{\text{RHE}}, \text{pH}14}^{\text{H}_2\text{O}} - \Delta G_{a,0 \text{ V}_{\text{RHE}}, \text{pH}0}^{\text{H}_3\text{O}^+} \quad (15)$$

According to Eq. (6), Eq. (10), and Eq. (15), we could then correlate the alkaline barrier at 0 V vs. RHE at pH = 7 ( $\Delta G_{a,0 \text{ V}_{\text{RHE}}, \text{pH}7}^{\text{H}_2\text{O}}$ ) to the acidic barrier at 0 V vs. SHE at pH = 7 ( $\Delta G_{a,0 \text{ V}_{\text{SHE}}, \text{pH}7}^{\text{H}_3\text{O}^+}$ ) through:

$$\begin{aligned} \Delta G_{a,0 \text{ V}_{\text{RHE}}, \text{pH}7}^{\text{H}_2\text{O}} &= \Delta G_{a,0 \text{ V}_{\text{RHE}}, \text{pH}14}^{\text{H}_2\text{O}} - \beta 2.3k_{\text{B}}T(7-14) \\ &= (\Delta G_{a,0 \text{ V}_{\text{RHE}}, \text{pH}0}^{\text{H}_3\text{O}^+} + \Delta\Delta G_{\text{alkaline corr}}) - \beta 2.3k_{\text{B}}T(7-14) \\ &= ((\Delta G_{a,0 \text{ V}_{\text{SHE}}, \text{pH}7}^{\text{H}_3\text{O}^+} - 2.3k_{\text{B}}T(7-0)) + \Delta\Delta G_{\text{alkaline corr}}) - \\ &\quad \beta 2.3k_{\text{B}}T(7-14) \\ &= \Delta G_{a,0 \text{ V}_{\text{SHE}}, \text{pH}7}^{\text{H}_3\text{O}^+} + \Delta\Delta G_{\text{alkaline corr}} - (1-\beta)2.3k_{\text{B}}T \times 7 \end{aligned} \quad (16)$$

The charge transfer coefficient  $\beta$  is determined explicitly from the Bader charge analysis. However, determining the exact  $\Delta\Delta G_{\text{alkaline corr}}$  for each single protonation step will be tedious and computational challenging as we discussed above (see Page 8). Therefore, we assume that the effect of altering hydrogen source from  $\text{H}_3\text{O}^+$  to water on other protonation reactions is the same as on the Volmer reaction. If we assume a protonation reaction with

$\beta = 0.5$  and  $\Delta\Delta G_{\text{alkaline corr}} = 0.21$  eV, the alkaline barrier  $\Delta G_{a,0 \text{ V}_{\text{RHE}}, \text{pH}7}^{\text{H}_2\text{O}}$  is estimated to have

a similar height to the acidic barrier of  $\Delta G_{a,0 \text{ V}_{\text{SHE}}, \text{pH}7}^{\text{H}_3\text{O}^+}$  based on Eq. (16): both would be 0.42 eV higher than  $\Delta G_{a,0 \text{ V}_{\text{RHE}}, \text{pH}0}^{\text{H}_3\text{O}^+}$ .

We note that our assumption for  $\Delta\Delta G_{\text{alkaline corr}}$  is entirely based on a comparison from previously calculated barriers for the hydrogen evolution reaction (HER),<sup>9</sup> and that changes

in  $\beta$  and  $\Delta\Delta G_{\text{alkaline corr}}$  will result in barrier differences between  $\Delta G_{a,0 \text{ V}_{\text{RHE}}, \text{pH}7}^{\text{H}_2\text{O}}$  and

$\Delta G_{a,0 \text{ V}_{\text{SHE}}, \text{pH}7}^{\text{H}_3\text{O}^+}$ .  $\text{H}_3\text{O}^+$  is inherently less stable than water at standard conditions, and thus the energetic difference between the alkaline barriers relative to the acidic barriers is expected

to be positive. Next, it has been experimentally measured in Markovic’s group that the exchange current density of HER is two to three orders of magnitude lower when operating under alkaline conditions (0.1 M NaOH, pH = 13)<sup>32</sup> compared to acidic conditions (0.1 M  $\text{HClO}_4$ , pH = 1)<sup>33</sup>. Thus, the experimentally determined activation energies are

$\Delta H_{a,0 \text{ V}_{\text{RHE}}, \text{pH}1}^{\text{H}_3\text{O}^+} = 0.19$  eV and  $\Delta H_{a,0 \text{ V}_{\text{RHE}}, \text{pH}13}^{\text{H}_2\text{O}} = 0.48$  eV, respectively. As the TS is assumed

to have no entropic contributions, the  $\Delta G_{a,0V_{\text{RHE}},\text{pH}0}^{\text{H}_3\text{O}^+}$  and  $\Delta G_{a,0V_{\text{RHE}},\text{pH}14}^{\text{H}_2\text{O}}$  could be determined as 0.21 eV and 0.44 eV based on Eq. (7) and Eq. (12), respectively, if a  $\beta$  of 0.65 (the same as in **Table S7**) is employed. Therefore, the  $\Delta\Delta G_{\text{alkaline corr}}$  is determined as 0.23 eV using experimentally available data for HER. If we assume a worse-case alkaline barrier correction  $\Delta\Delta G_{\text{alkaline corr}} = 0.25$  eV, the largest change in  $\Delta G_{a,0V_{\text{RHE}},\text{pH}7}^{\text{H}_2\text{O}}$  is found to be 0.085 eV for the Reaction 11 with a  $\beta$  of 0.6; and the smallest change is 0.023 eV for the Reaction 8 with a  $\beta$  of 0.45; while for the rest of protonation reactions with a  $\beta$  of 0.5, the change is 0.04 eV. These changes are well within DFT errors for determining barriers in general; therefore, we focus more on the trends rather than exact barrier values.

**Table S7** lists the estimated  $\Delta G_{a,0V_{\text{RHE}}}^{\text{H}_2\text{O}}$  for protonation steps within the  $\text{CO}_{(2)}\text{R}$ , using an alkaline correction of  $\Delta\Delta G_{\text{alkaline corr}} = 0.21$  eV. The barriers for the Volmer and Heyrovsky reactions (Reaction 1 and 2 in **Table S7**) were explicitly corrected using  $\Delta\Delta G_{\text{alkaline corr}} = 0.25$  eV and 0.37 eV, respectively, according to Ref.<sup>9</sup>.

**Table S7. Forward activation energies  $\Delta G_a$  and backward activation energies  $\Delta G_b$  at  $U_{\text{RHE}} = 0$  V.** The charge-transfer coefficient  $\beta$  for each protonation step is also provided.  $\beta$  was determined by calculating the Bader charge of TS.  $\Delta G_b$  was used during charge extrapolation for obtaining the barriers of Reaction 8 and 10. These barriers remain unchanged in the microkinetic modeling at a certain pH.

| Reaction index | Reaction                                                                                             | $\beta$ | pH = 7            |                   | pH = 13           |                   |
|----------------|------------------------------------------------------------------------------------------------------|---------|-------------------|-------------------|-------------------|-------------------|
|                |                                                                                                      |         | $\Delta G_a$ (eV) | $\Delta G_b$ (eV) | $\Delta G_a$ (eV) | $\Delta G_b$ (eV) |
| 1              | $\text{H}^+ + \text{e}^- + * \leftrightarrow \text{H}^*$                                             | 0.65    | 1.33              |                   | 1.10              |                   |
| 2              | $\text{H}^+ + \text{e}^- + \text{H}^* \leftrightarrow \text{H}_2(\text{g}) + *$                      | 0.65    | 1.01              |                   | 0.78              |                   |
| 3              | $\text{H}^* + \text{H}^* \leftrightarrow \text{H}_2(\text{g}) + 2*$                                  |         | 0.92              |                   | 0.92              |                   |
| 4              | $\text{CO}^* + \text{H}^+ + \text{e}^- \leftrightarrow \text{CHO}^*$                                 | 0.50    | 1.36              |                   | 1.18              |                   |
| 5              | $\text{CO}^* + \text{H}^* \leftrightarrow \text{CHO}^* + *$                                          |         | 1.13              |                   | 1.13              |                   |
| 6              | $\text{CO}^* + \text{H}^+ + \text{e}^- \leftrightarrow \text{COH}^*$                                 | 0.50    | 1.10              |                   | 0.92              |                   |
| 7              | $\text{CHO}^* + \text{H}^+ + \text{e}^- \leftrightarrow \text{CHOH}^*$                               |         | 0.18              |                   | 0.18              |                   |
| 8              | $\text{COH}^* + \text{H}^+ + \text{e}^- \leftrightarrow \text{C}^* + \text{H}_2\text{O}(\text{g})$   | 0.45    |                   | 0.80              |                   | 0.61              |
| 9              | $\text{COH}^* + \text{H}^* \leftrightarrow \text{CHOH}^* + *$                                        |         | 0.67              |                   | 0.67              |                   |
| 10             | $\text{CHOH}^* + \text{H}^+ + \text{e}^- \leftrightarrow \text{CH}^* + \text{H}_2\text{O}(\text{g})$ | 0.50    |                   | 1.73              |                   | 1.55              |
| 11             | $\text{C}^* + \text{H}^+ + \text{e}^- \leftrightarrow \text{CH}^*$                                   | 0.60    | 0.91              |                   | 0.70              |                   |
| 12             | $\text{C}^* + \text{H}^* \leftrightarrow \text{CH}^* + *$                                            |         | 0.58              |                   | 0.58              |                   |
| 13             | $\text{CH}^* + \text{H}^+ + \text{e}^- \leftrightarrow \text{CH}_2^*$                                | 0.50    | 0.98              |                   | 0.80              |                   |
| 14             | $\text{CH}^* + \text{H}^* \leftrightarrow \text{CH}_2^* + *$                                         |         | 0.62              |                   | 0.62              |                   |
| 15             | $\text{CH}_2^* + \text{H}^+ + \text{e}^- \leftrightarrow \text{CH}_3^*$                              | 0.50    | 0.80              |                   | 0.62              |                   |
| 16             | $\text{CH}_2^* + \text{H}^* \leftrightarrow \text{CH}_3^* + *$                                       |         | 0.62              |                   | 0.62              |                   |
| 17             | $\text{CH}_3^* + \text{H}^+ + \text{e}^- \leftrightarrow \text{CH}_4(\text{g}) + *$                  | 0.50    | 0.72              |                   | 0.54              |                   |
| 18             | $\text{CH}_3^* + \text{H}^* \leftrightarrow \text{CH}_4(\text{g}) + 2*$                              |         | 0.33              |                   | 0.33              |                   |

|    |                                                                                      |      |      |      |
|----|--------------------------------------------------------------------------------------|------|------|------|
| 19 | $\text{OCCO}^{**} + \text{H}^+ + \text{e}^- \leftrightarrow \text{OCCOH}^{**}$       | 0.50 | 0.57 | 0.39 |
| 20 | $\text{CO}^* + \text{COH}^* \leftrightarrow \text{OCCOH}^{**}$                       |      | 0.87 | 0.87 |
| 21 | $\text{CO}^* + \text{CHO}^* \leftrightarrow \text{OCCHO}^{**}$                       |      | 1.05 | 1.05 |
| 22 | $\text{CO}^* + \text{C}^* \leftrightarrow \text{CCO}^* + *$                          |      | 0.73 | 0.73 |
| 23 | $\text{CO}_{\text{HP}} + \text{C}^* \leftrightarrow \text{CCO}^*$                    |      | 0.31 | 0.31 |
| 24 | $\text{CCO}^* + \text{H}^+ + \text{e}^- \leftrightarrow \text{CHCO}^*$               | 0.50 | 0.87 | 0.69 |
| 25 | $\text{CO}^* + \text{CH}^* \leftrightarrow \text{CHCO}^* + *$                        |      | 0.97 | 0.97 |
| 26 | $\text{CH}_2^* + \text{CH}_2^* \leftrightarrow \text{C}_2\text{H}_4(\text{g}) + 2^*$ |      | 0.69 | 0.69 |

\* one surface site; \*\* two surface sites; HP: Helmholtz plane; TSs of the chemical coupling reactions including Reactions 21–23 are considered for the field effect described in **Supplementary Note 4**.

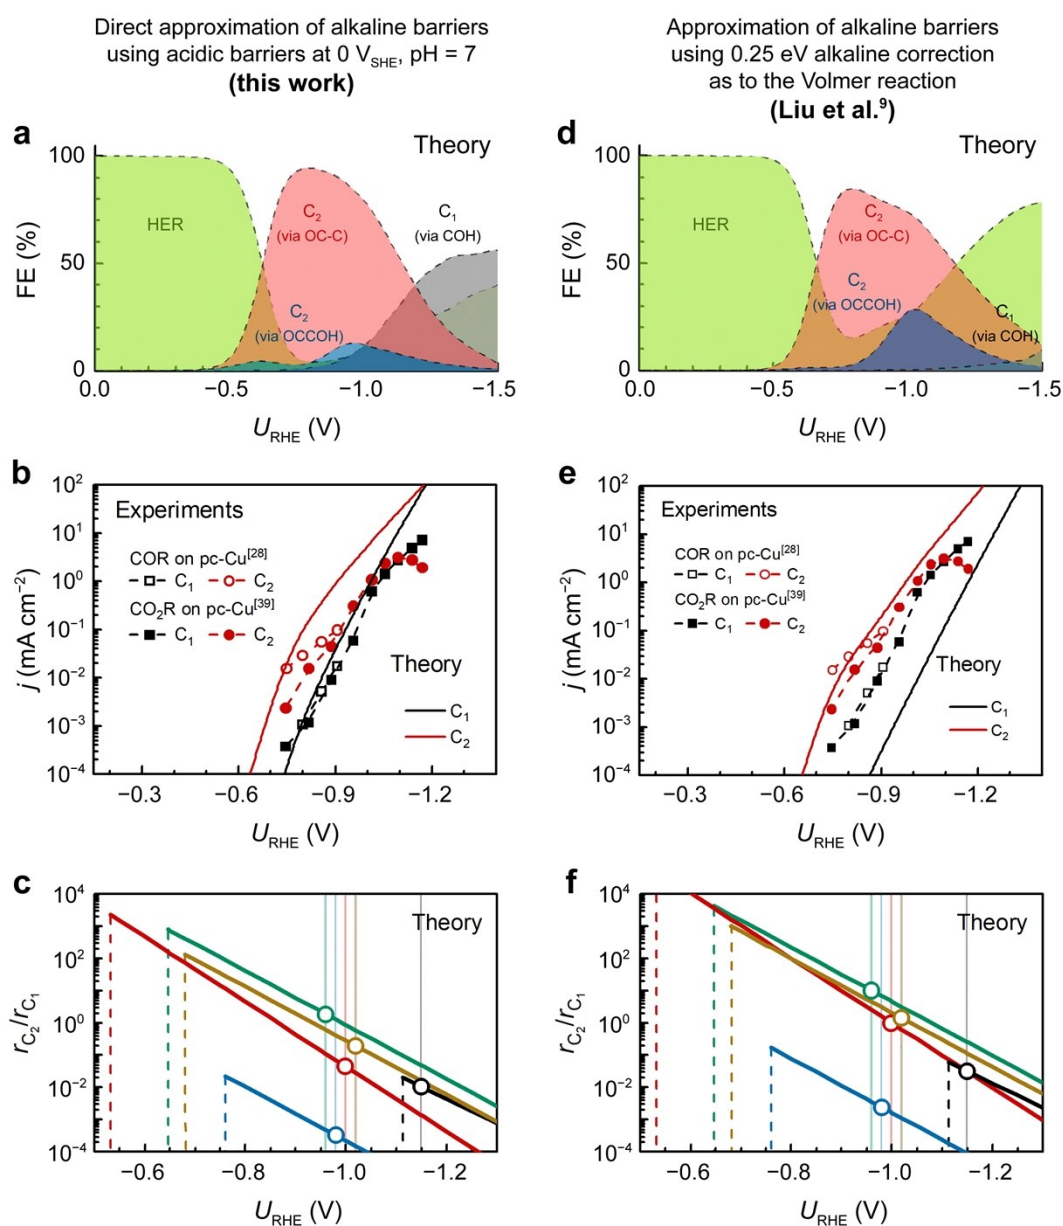

**Figure S5. Comparison between two approaches of approximating the alkaline barriers from**

**the acidic barriers.** (Left) Direct approximation of  $\Delta G_{a,0}^{H_2O} V_{RHE, pH7}$  as  $\Delta G_{a,0}^{H_3O^+} V_{SHE, pH7}$ : (a–c) microkinetic modeling results shown in this work as **Figure 3a**, **Figure 3b**, and **Figure 5d**, respectively. (Right) Approximation of  $\Delta G_{a,0}^{H_2O} V_{RHE, pH7}$  based on Eq. (16) using the same  $\Delta\Delta G_{alkaline, corr} = 0.25$  eV as to the Volmer reaction and the explicit numbers of  $\beta$ : (d–f) modified microkinetic modeling results.

The comparison between microkinetic modeling results based on two approximation methods for alkaline barriers is shown in **Figure S5**. Compared to the results present in this work, the above changes due to approximative method for alkaline barriers, as well as in the activation energies of key steps including Reaction 6, 8, 11, and 19 in **Table S7**, induce some differences to the microkinetic modeling leading to dissimilar observations:

- The overall rate of COR through the COH/OC-C pathway is lowered due to the slight increase in CO-H barrier, leading to more predominant HER across the studied potential range.
- The relative dominance of the COH/OC-C pathway vs. the OCCOH pathway in reaction rates is weakened due to the slight increase in CO-H barrier vs. the unchanged CO dimerization reaction energy.
- The  $C_1$  pathway through C-H protonation is suppressed due to the largest change in barrier vs. the unchanged C-CO coupling barrier, resulting in a more negative potential at which the  $C_1$  rate equals to the  $C_2$  rate.
- The predicted  $r_{C_2}/r_{C_1}$  becomes higher for every single-crystal Cu facets and quantitatively closer to the experimental values, but the general trends in  $C_2/C_1$  selectivity among different Cu facets remain unchanged.

Overall, the trends described and the theoretical insights obtained in this work are

consistent whether we use the  $\Delta G_{a,0}^{H_3O^+} V_{SHE, pH7}$  to directly estimate  $\Delta G_{a,0}^{H_2O} V_{RHE, pH7}$  or a  $\Delta\Delta G_{alkaline}$

$_{corr} = 0.25$  eV to correct the  $\Delta G_{a,0}^{H_3O^+} V_{SHE, pH0}$  to  $\Delta G_{a,0}^{H_2O} V_{RHE, pH14}$ . Nevertheless, we point out that:

- Despite the higher barriers at the same  $U_{RHE}$ , water is more likely to be the hydrogen source for protonation reactions at neutral and alkaline conditions due to the abundance of water and the extremely low availability of  $H_3O^+$  at these conditions.
- Any underestimation of the alkaline protonation barriers will result in overestimated rate of the reduction step vs. the C–C coupling step starting from the same surface species (e.g., CO-H protonation vs. CO dimerization; C-H protonation vs. C-CO coupling)

**Supplementary Note 6: Details of the microkinetic models**

Mean-field microkinetic models are simulated with the CATMAP software package.<sup>34</sup> The CatMAP software package used in this work can be accessed and downloaded through <https://github.com/SUNCAT-Center/catmap>. In our microkinetic models,  $CH_4(g)$  was taken as an example of  $C_1$  products,  $C_2H_4(g)$  was taken as an example of  $C_2$  products, and

H<sub>2</sub>(g) was included as the main side product. We note that as mentioned in the main text, we have assumed all the reaction steps after the formation of OCCH\* to be downhill in energy. And therefore the results will remain unchanged whether the example C<sub>2</sub> product is chosen to be ethanol or ethylene. Both proton-electron transfer and surface hydrogenation pathways were taken into account. All the elementary steps are described as follows:

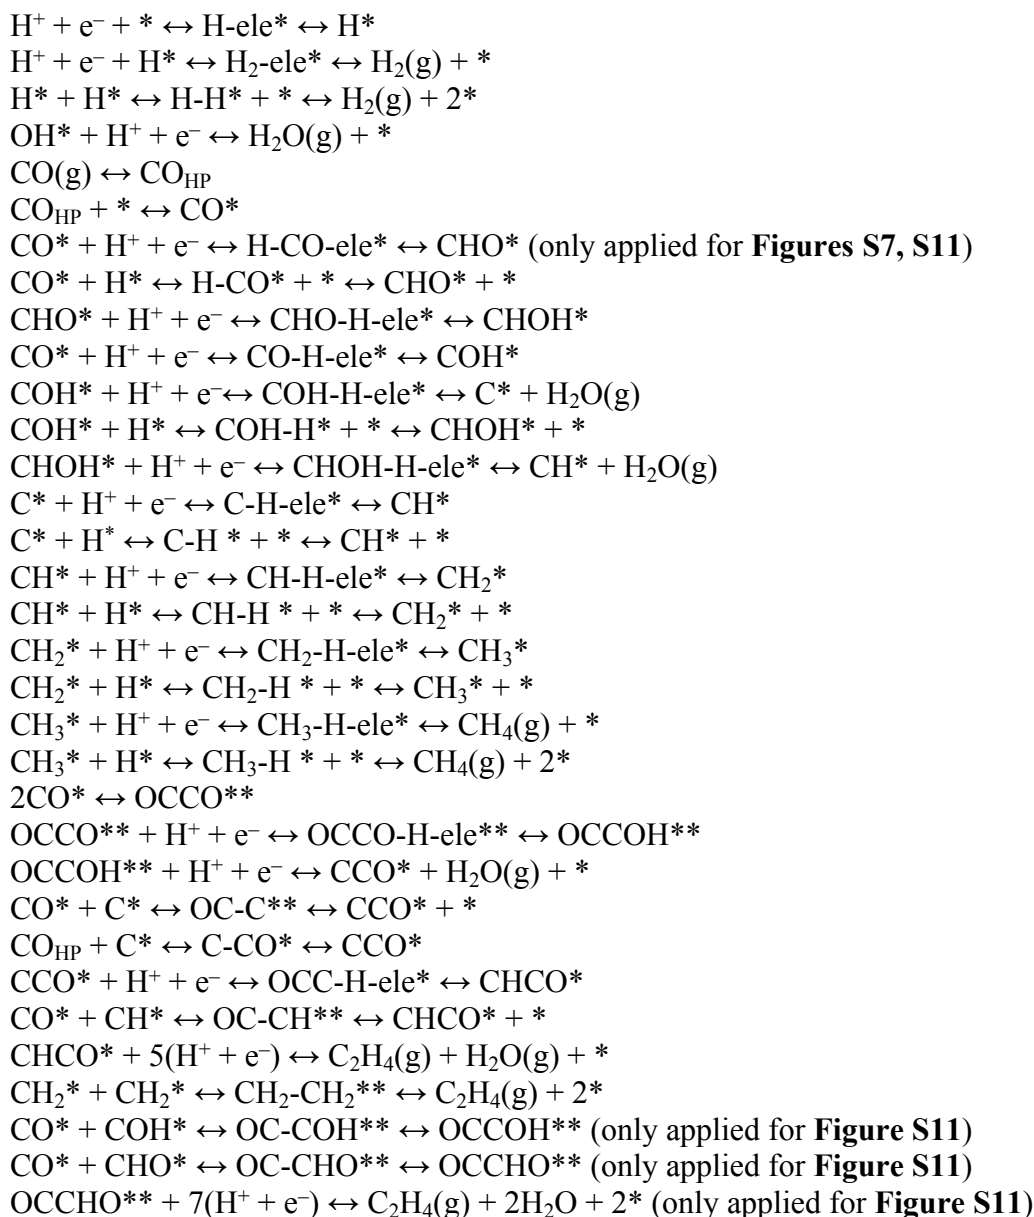

(\* one surface site; \*\* two surface sites; HP: Helmholtz plane)

Note that all above reactions actually use alkaline barriers of  $\Delta G_{a,0}^{\text{H}_2\text{O}}$  shown in **Table S7** and the alkaline protonation step of  $\text{X}^* + \text{H}_2\text{O} + \text{e}^- \rightarrow \text{XH}^* + \text{OH}^-$  is written as the corresponding acidic form of  $\text{X}^* + \text{H}^+ + \text{e}^- \rightarrow \text{XH}^*$  to fit with the CATMAP software package, in which the CHE model is implemented in to correct the energies of proton and

electron at a RHE scale.<sup>20</sup> And the actual concentration of H<sup>+</sup> is defined to be the same as water probability [H<sub>2</sub>O] of 1.

Adsorbate-adsorbate interactions are considered for all possible reaction intermediate pairs. The following equations are adopted to describe the adsorption energy as a function of coverage<sup>35, 36</sup>

$$E_i(\theta_i) = \begin{cases} E_i^0 & \text{when } |\theta| \leq \theta_0 \\ E_i^0 + \sum_j f \varepsilon_{ij} \theta_j & \text{when } |\theta| > \theta_0 \end{cases} \quad (17)$$

where  $E_i(\theta_i)$  denotes the differential adsorption energy of species  $i$  at coverage  $\theta_i$ ,  $E_i^0$  the differential adsorption energy at low coverage limit,  $\theta_0$  the threshold coverage (0.25 monolayer (ML) in this work),  $|\theta|$  the sum of the surface coverages of all adsorbates except H\* (the H\* coverage is excluded to account for H\* being much smaller than CO and therefore has little effect on determining the strength of the interactions),  $\varepsilon_{ij}$  the cross-interaction parameter between species  $i$  and  $j$ ,  $f$  the fractional coverage, which can be

calculated as 
$$f = \frac{|\theta| - \theta_0}{|\theta|}$$
.

As shown above, the interactions are significant only when adsorbate coverages exceed a threshold of about 0.25 ML, and CO\* is the only intermediate that has a coverage above this threshold in the potential range of interest, therefore only the interactions between CO\* and other intermediates affect the energetics. The energetics of intermediates and TSs are therefore all functions of coverage.

The barriers and reaction energies could thus shift accordingly at high surface coverage. We have explicitly parameterized the CO self-interaction and its cross-interaction parameters with the species in the rate-limiting steps. For the other intermediates that are not in the rate-limiting steps, their interaction parameters do not change the kinetic results significantly. We therefore have assumed the interaction parameters to be the same due to the similar sizes of molecules.

The adsorbate cross-interaction parameters were listed below.

$$\begin{aligned} \epsilon_{\text{CO}^*, \text{CO}^*} &= 2.47 \\ \epsilon_{\text{CO}^*, \text{H}^*} &= 0.73 \\ \epsilon_{\text{CO}^*, \text{H-ele}^*} &= 0.79 \\ \epsilon_{\text{CO}^*, \text{H2-ele}^*} &= 0.51 \\ \epsilon_{\text{CO}^*, \text{H-H}^*} &= 1.16 \\ \epsilon_{\text{CO}^*, \text{H-CO-ele}^*} &= \epsilon_{\text{CO}^*, \text{CHO}^*} = 3.33 \\ \epsilon_{\text{CO}^*, \text{CO-H-ele}^*} &= \epsilon_{\text{CO}^*, \text{COH}^*} = \epsilon_{\text{CO}^*, \text{COH-H}^*} = 2.84 \\ \epsilon_{\text{CO}^*, \text{C}^*} &= \epsilon_{\text{CO}^*, \text{C-H-ele}^*} = \epsilon_{\text{CO}^*, \text{OCCO-H-ele}^*} = \epsilon_{\text{CO}^*, \text{OCCO}^*} = \epsilon_{\text{CO}^*, \text{OCCOH}^*} = \epsilon_{\text{CO}^*, \text{C-CO}^*} = \epsilon_{\text{CO}^*, \\ \text{OC-C}^*} &= \epsilon_{\text{CO}^*, \text{OC-CH}^*} = \epsilon_{\text{CO}^*, \text{OCC-H-ele}^*} = \epsilon_{\text{CO}^*, \text{CCO}^*} = \epsilon_{\text{CO}^*, \text{CHCO}^*} = \epsilon_{\text{CO}^*, \text{H-CO}^*} = \epsilon_{\text{CO}^*, \text{CH-H}^*} = \epsilon_{\text{CO}^*, \\ \text{CH2-H}^*} &= \epsilon_{\text{CO}^*, \text{CH3-H}^*} = 2.47 \\ \epsilon_{\text{CO}^*, \text{CH}^*} &= \epsilon_{\text{CO}^*, \text{CH-H-ele}^*} = 1.85 \\ \epsilon_{\text{CO}^*, \text{OH}^*} &= 1.60 \\ \epsilon_{\text{OH}^*, \text{OH}^*} &= 1.03 \\ \text{CH}_2^*, \text{CH}_3^*, \text{and CHOH}^* &\text{ were assumed to have same interactions as those of CO}^*. \\ \text{All unlisted } \epsilon_{i,j} &\text{ are assumed to be zero.} \end{aligned}$$

### Supplementary Note 7: CO\* overbinding correction



We have applied an overbinding correction to CO adsorption energies on strong-binding metals (Ir, Rh, Pt, Pd, and Ni) due to generalized gradient approximations (GGA) functionals generally positioning the unfilled  $2\pi^*$  orbital at too low energy. The correction is based on the vibrational frequency of the internal CO stretch mode of  $^*CO$ , relative to the frequency in vacuum.<sup>37</sup> The vibrational frequencies can be found in **Table S8**.

**Table S8. The  $\nu_{CO}$  for overbinding correction.** Harmonic vibrational frequencies for the CO internal stretch mode ( $\nu_{CO}$ ), ZPE, and overbinding correction ( $E_{corr} = 1.8 - 0.0008 \times \nu_{CO}$ ) found for adsorption onto different metals and adsorption sites. The overbinding correction was only applied to strong-binding metals of Pd, Pt, Rh, Ni, and Ir.

| Surface orientation | Metal | $\nu_{CO}$ (cm <sup>-1</sup> ) |        |            | ZPE (eV) |        |            | $E_{corr}$ (eV) |        |            |
|---------------------|-------|--------------------------------|--------|------------|----------|--------|------------|-----------------|--------|------------|
|                     |       | onto p                         | bridge | hcp hollow | onto p   | bridge | hcp hollow | onto p          | bridge | hcp hollow |
| 111                 | Au    | 2065                           |        | 1845       | 0.17     |        | 0.16       |                 |        |            |
|                     | Cu    | 2020                           |        | 1814       | 0.18     |        | 0.16       |                 |        |            |
|                     | Pd    | 2026                           |        | 1769       | 0.19     |        | 0.19       | 0.18            |        | 0.38       |
|                     | Pt    | 2049                           |        | 1755       | 0.21     |        | 0.19       | 0.16            |        | 0.40       |
|                     | Rh    | 1984                           |        | 1728       | 0.20     |        | 0.18       | 0.21            |        | 0.42       |
|                     | Ni    | 2001                           |        | 1753       | 0.20     |        | 0.18       | 0.20            |        | 0.40       |
|                     | Ir    | 1999                           |        | 1704       | 0.22     |        | 0.18       | 0.20            |        | 0.44       |
| 211                 | Ag    | 2038                           | 1967   |            | 0.15     | 0.15   |            |                 |        |            |
|                     | Au    | 2054                           | 1886   |            | 0.17     | 0.18   |            |                 |        |            |
|                     | Cu    | 2026                           | 1898   |            | 0.18     | 0.17   |            |                 |        |            |
|                     | Pd    | 2021                           | 1867   |            | 0.19     | 0.19   |            | 0.18            | 0.31   |            |
|                     | Pt    | 2031                           | 1843   |            | 0.20     | 0.20   |            | 0.18            | 0.33   |            |
|                     | Rh    | 1973                           | 1822   |            | 0.20     | 0.19   |            | 0.22            | 0.34   |            |
|                     | Ni    | 1994                           | 1855   |            | 0.20     | 0.19   |            | 0.21            | 0.32   |            |
|                     | Ir    | 1980                           | 1808   |            | 0.21     | 0.19   |            | 0.22            | 0.35   |            |
| 100                 | Au    | 2066                           |        |            | 0.17     |        |            |                 |        |            |
|                     | Cu    | 2079                           | 1942   | 1766       | 0.17     | 0.17   | 0.14       |                 |        |            |
|                     | Pd    | 2015                           | 1860   | 1687       | 0.18     | 0.19   | 0.16       | 0.19            | 0.31   | 0.45       |
|                     | Pt    | 2041                           | 1842   | 1676       | 0.20     | 0.20   | 0.15       | 0.17            | 0.33   | 0.46       |
|                     | Rh    | 1971                           | 1819   | 1642       | 0.20     | 0.19   | 0.16       | 0.22            | 0.34   | 0.49       |
|                     | Ni    | 1990                           | 1835   | 1617       | 0.19     | 0.19   | 0.17       | 0.21            | 0.33   | 0.51       |
|                     | Ir    | 1993                           |        | 1622       | 0.22     |        | 0.16       | 0.21            |        | 0.50       |

After overbinding correction, the theoretically calculated CO binding energies ( $E_{CO}^{theo}$ , ZPE and  $E_{corr}$  added) show better agreement with the experimental CO binding energies measured at high-vacuum conditions ( $E_{CO}^{exp}$ ) (**Figure S6**). The mean absolute error (MAE) decreases from 0.21 eV to 0.17 eV through overbinding correction. Moreover, with the overbinding correction, we can predict the CO binding sites on strong-binding metals of Pt

and Rh correctly: before correction, the hcp hollow sites are predicted for CO adsorption; after correction, the ontop sites are predicted, which have also been experimentally validated.

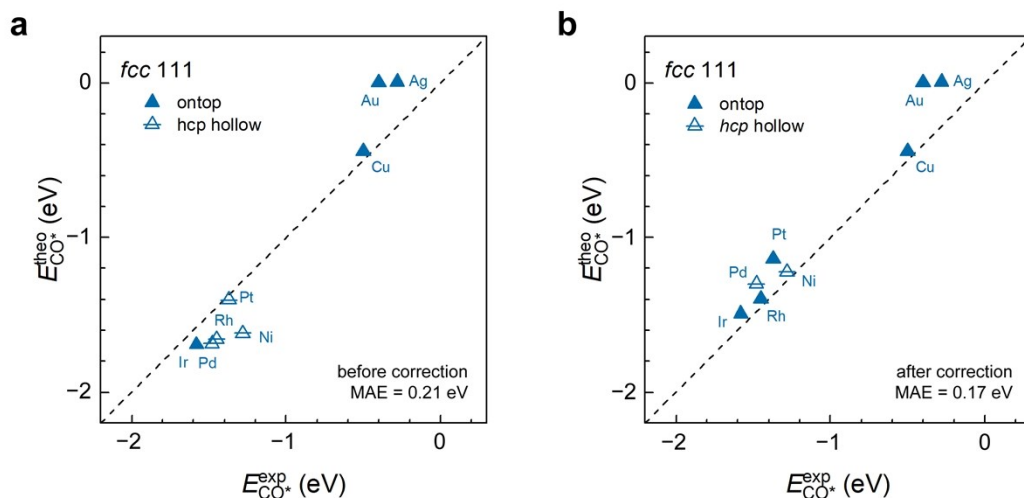

**Figure S6. Comparison between experimental and theoretical CO binding energies.** (a) Before correction and (b) after correction. The theoretical CO binding energies are obtained using a correction for overbinding, according to  $E_{corr} = 1.8 - 0.0008 \times \nu_{CO}$  and including ZPE. The experimental CO binding energies were directly adopted from Abild-Pedersen et al.<sup>37</sup>.

All relaxed structures and energetics are available on the Catalysis-Hub database.<sup>38</sup> Adsorption energies for building selectivity maps in **Figure 6** and **Figures S18–S22** could be found in **Table S9**. All computational data linked to the list of corresponding □electronic energies has been released as part of the Catalysis-hub.org repository<sup>38</sup> under <https://www.catalysis-hub.org/publications/PengThe2020>.

**Table S9. Energetics of all species on various metals and intermetallics.** All adsorption energies  $G$  (in eV) are referenced to CO, H<sub>2</sub>O, and H<sub>2</sub> (ref). The  $G$  of an adsorbate are identified as reaction free energy change ( $\Delta G$ ) of the formation reaction from reference gas-phase molecules. Note that the solvation corrections are not applied herein.

| <i>fcc</i> (111)  | Ag   | Au   | Cu    | Pd    | Pt    | Rh    | Ni    | Ir    |
|-------------------|------|------|-------|-------|-------|-------|-------|-------|
| CO*               | 0.49 | 0.48 | 0.05  | -0.81 | -0.64 | -0.90 | -0.73 | -1.00 |
| H*                |      | 0.66 | 0.21  | -0.26 | -0.11 | -0.17 | -0.37 |       |
| C*                | 3.84 | 2.82 | 2.34  | 0.04  | 0.12  | -0.32 | 0.13  | -0.26 |
| CH*               | 2.52 | 1.69 | 1.21  | -0.52 | -0.73 | -0.86 | -0.57 |       |
| CCO*              | 0.96 | 0.84 | 0.11  | -0.50 | -0.61 | -0.94 | -0.86 |       |
| <i>fcc</i> (211)  | Ag   | Au   | Cu    | Pd    | Pt    | Rh    | Ni    | Ir    |
| CO*               | 0.30 | 0.19 | -0.20 | -0.79 | -0.97 | -0.96 | -0.84 | -1.38 |
| H*                | 0.49 | 0.38 | 0.08  | -0.16 | -0.30 | -0.26 | -0.24 |       |
| C*                | 3.14 | 2.75 | 1.32  | -0.69 | -0.05 | -0.78 | -0.83 | -0.47 |
| CH <sub>2</sub> * | 1.14 | 0.44 | 0.28  | -0.46 | -0.99 | -0.83 | -0.62 |       |
| <i>fcc</i> (100)  | Ag   | Au   | Cu    | Pd    | Pt    | Rh    | Ni    | Ir    |

|                                                 |                             |                                          |                                          |                                          |       |       |       |          |
|-------------------------------------------------|-----------------------------|------------------------------------------|------------------------------------------|------------------------------------------|-------|-------|-------|----------|
| CO*                                             | 0.35                        | 0.25                                     | -0.12                                    | -0.77                                    | -0.92 | -0.98 | -0.76 | -1.27    |
| COH*                                            |                             |                                          | 1.18                                     | -0.14                                    |       | -0.67 | -0.55 |          |
| C*                                              | 2.87                        | 2.50                                     | 0.95                                     | -0.80                                    | -0.56 | -1.24 | -1.18 | -1.12    |
| CH*                                             | 1.86                        |                                          | 0.36                                     | -0.57                                    |       | -1.24 | -1.18 |          |
| CCO*                                            | 0.61                        |                                          | -0.42                                    | -0.68                                    |       | -1.43 | -1.42 |          |
| Various Cu facets                               | (110)                       | (310)                                    | (511)                                    | (711)                                    | (521) | (621) | (653) | (111)-SV |
| CO*                                             | -0.24                       | -0.28                                    | -0.13                                    | -0.14                                    | -0.27 | -0.31 | -0.26 | -0.09    |
| C*                                              | 1.57                        | 1.08                                     | 1.16                                     | 1.06                                     | 1.28  | 1.04  | 1.39  | 1.63     |
| L1 <sub>2</sub> A <sub>3</sub> B intermetallics | Cu <sub>3</sub> Ag          | Cu <sub>3</sub> Al                       | Cu <sub>3</sub> Zn                       | Ag <sub>3</sub> Cu                       |       |       |       |          |
| CO*                                             | -0.11                       | 0.00                                     | -0.12                                    | -0.23                                    |       |       |       |          |
| C*                                              | 1.54                        | 0.21                                     | 1.47                                     | 1.62                                     |       |       |       |          |
| L1 <sub>0</sub> AB intermetallics               | CuAg                        | CuAl                                     | CuZn                                     |                                          |       |       |       |          |
| CO*                                             | -0.14                       | 0.17                                     | -0.02                                    |                                          |       |       |       |          |
| C*                                              | 1.30                        | 0.04                                     | 1.40                                     |                                          |       |       |       |          |
| Ni-Ga                                           | Ni <sub>3</sub> Ga<br>(100) | Ni <sub>5</sub> Ga <sub>3</sub><br>(100) | Ni <sub>5</sub> Ga <sub>3</sub><br>(221) | Ni <sub>5</sub> Ga <sub>3</sub><br>(111) |       |       |       |          |
| CO*                                             | -0.68                       | -0.63                                    | -0.78                                    | -0.57                                    |       |       |       |          |
| C*                                              | 0.85                        | 1.05                                     | 0.54                                     | 0.39                                     |       |       |       |          |

## 2. Supplementary Figures Relevant to the Contents in the Main Text

### 2.1. Reaction pathways for COR

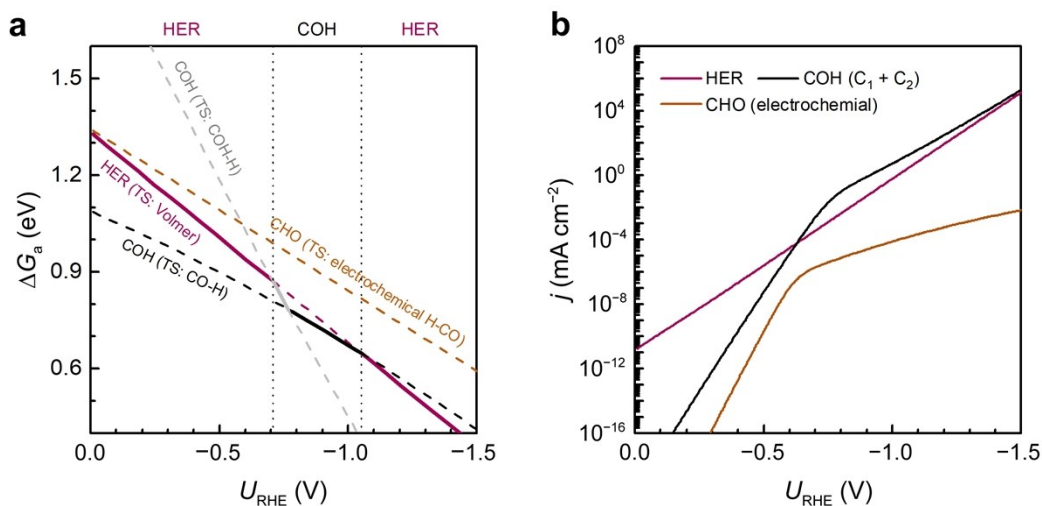

**Figure S7. Comparison between hydrogen evolution reaction (HER), the CHO pathway, and the COH pathway under COR conditions at pH = 7.** (a) Potential ( $U$ )-dependent activation energies ( $\Delta G_a$ ) for HER, the CHO pathway, and the COH pathway. The CHO pathway is assumed to be electrochemical.  $\Delta G_a$  for each reaction equals to  $G_{\text{TS: Volmer}}$  (for HER),  $G_{\text{TS: H-CO}} - G_{\text{CO}^*}$  (for the electrochemical CHO pathway), and  $G_{\text{TS: CO-H}} - G_{\text{CO}^*}/G_{\text{TS: CO-H}} - G_{\text{CO}^*}$  (for the COH pathway), respectively. Due to the different charge-transfer coefficient  $\beta$  (0.65 for the Volmer, 0.5 for H-CO protonation and CO-H protonation, and 0.45 for COH-H protonation), as well as the different degrees affected by the interfacial charge, each  $\Delta G_a$  exhibits different potential dependency. (b) Theoretical polarization curves obtained through microkinetic modeling, showing that even if the CHO formation step is assumed to be electrochemical with an explicitly calculated barrier as in Ref.<sup>9,39</sup>, the CHO pathway is kinetically slower than both HER and the COH pathway on Cu(100). Note that the energetics in (a) do not consider the adsorbate-adsorbate interaction while energetics in (b) consider, which give a slightly different potential window where the COH pathway dominates over HER.

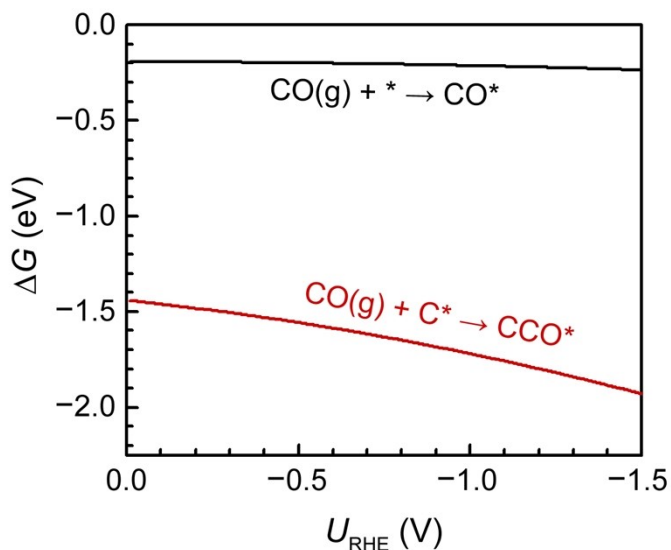

**Figure S8. Comparison between CO adsorption and C-CO coupling toward CCO\*.** Free energy changes as a function of potential ( $U_{\text{RHE}}$ ) for CO adsorption ( $\text{CO}(\text{g}) + * \rightarrow \text{CO}^*$ ) and CCO formation ( $\text{CO}(\text{g}) + \text{C}^* \rightarrow \text{CCO}^*$ ), showing the strong tendency of forming CCO\* when C\* is present at the surface.

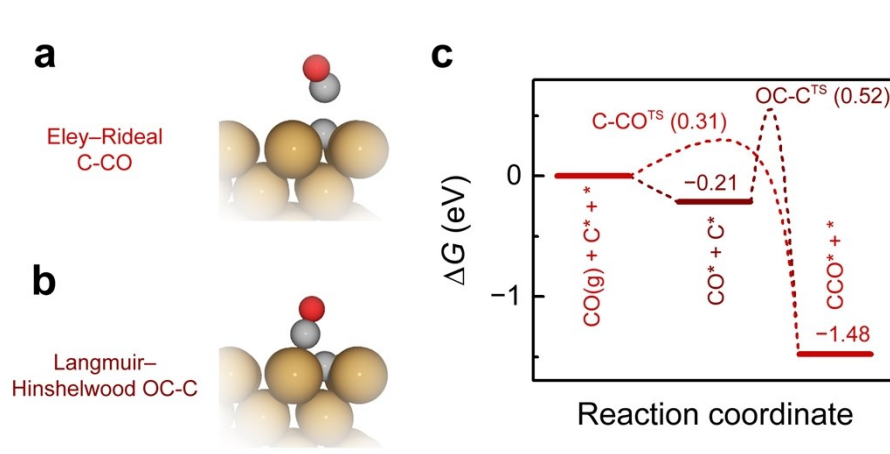

**Figure S9. Two mechanisms for C-CO coupling on Cu(100).** Optimized atomic configurations of TS structures of C-CO coupling: (a) Eley-Rideal mechanism ( $\text{C}^* + \text{CO}(\text{g}) \rightarrow \text{CCO}^*$ , denoted as C-CO) and (b) Langmuir-Hinshelwood mechanism ( $\text{C}^* + \text{CO}^* \rightarrow \text{CCO}^* + *$ , denoted as OC-C).<sup>40, 41</sup> (c) Gibbs free energy diagrams (FEDs) of C-CO and OC-C coupling, revealing the energetically favored Eley-Rideal pathway. Note that the energetics shown in this figure were obtained without field.

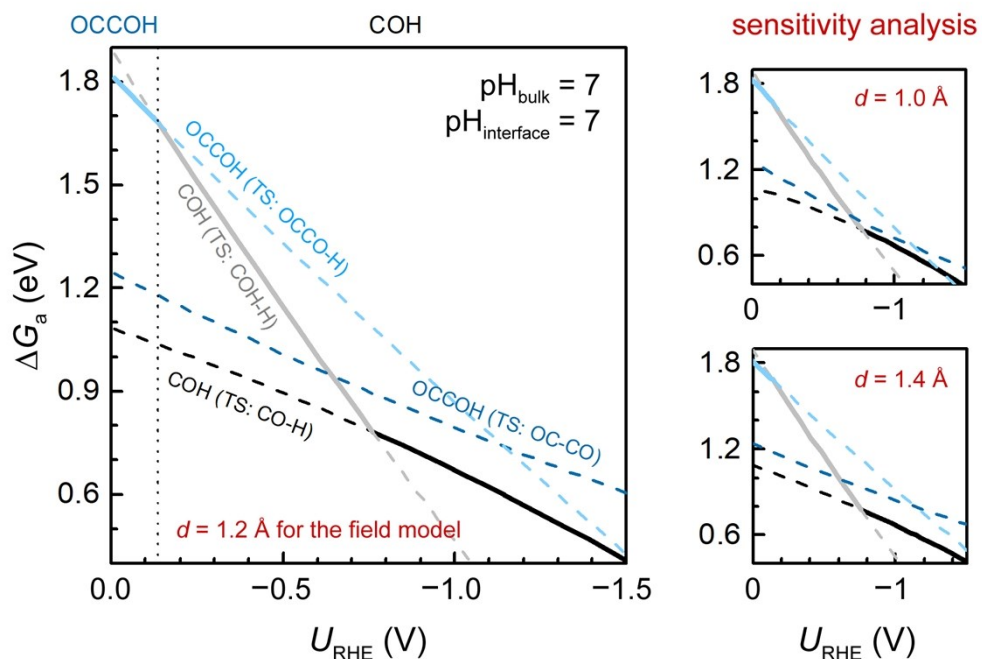

**Figure S10. Comparison between the OCCOH and COH pathways under COR conditions at  $\text{pH} = 7$ .** The definition of  $\Delta G_a$  for each pathway is shown to be: (*black*) COH (TS: CO-H):  $G_{\text{TS: CO-H}} - G_{\text{CO}^*}$ ; (*gray*) COH (TS: COH-H):  $G_{\text{TS: COH-H}} - G_{\text{CO}^*}$ ; (*blue*) OCCOH (TS: OC-CO):  $G_{\text{OCCO}^*} - 2G_{\text{CO}^*}$ ; (*azure*) OCCOH (TS: OCCO-H):  $G_{\text{TS: OCCO-H}} - 2G_{\text{CO}^*}$ . All the energetics were obtained using Eq. (3) and Eq. (4) and the parameters in **Table S3** and **Tables S5–S7**. Sensitivity analysis was performed by varying  $d$  from 1.0 to 1.4 Å and the induced difference in binding energies does not change the general trend that at more negative potentials, the COH/OC-C pathway is more favorable than the OCCOH pathway.

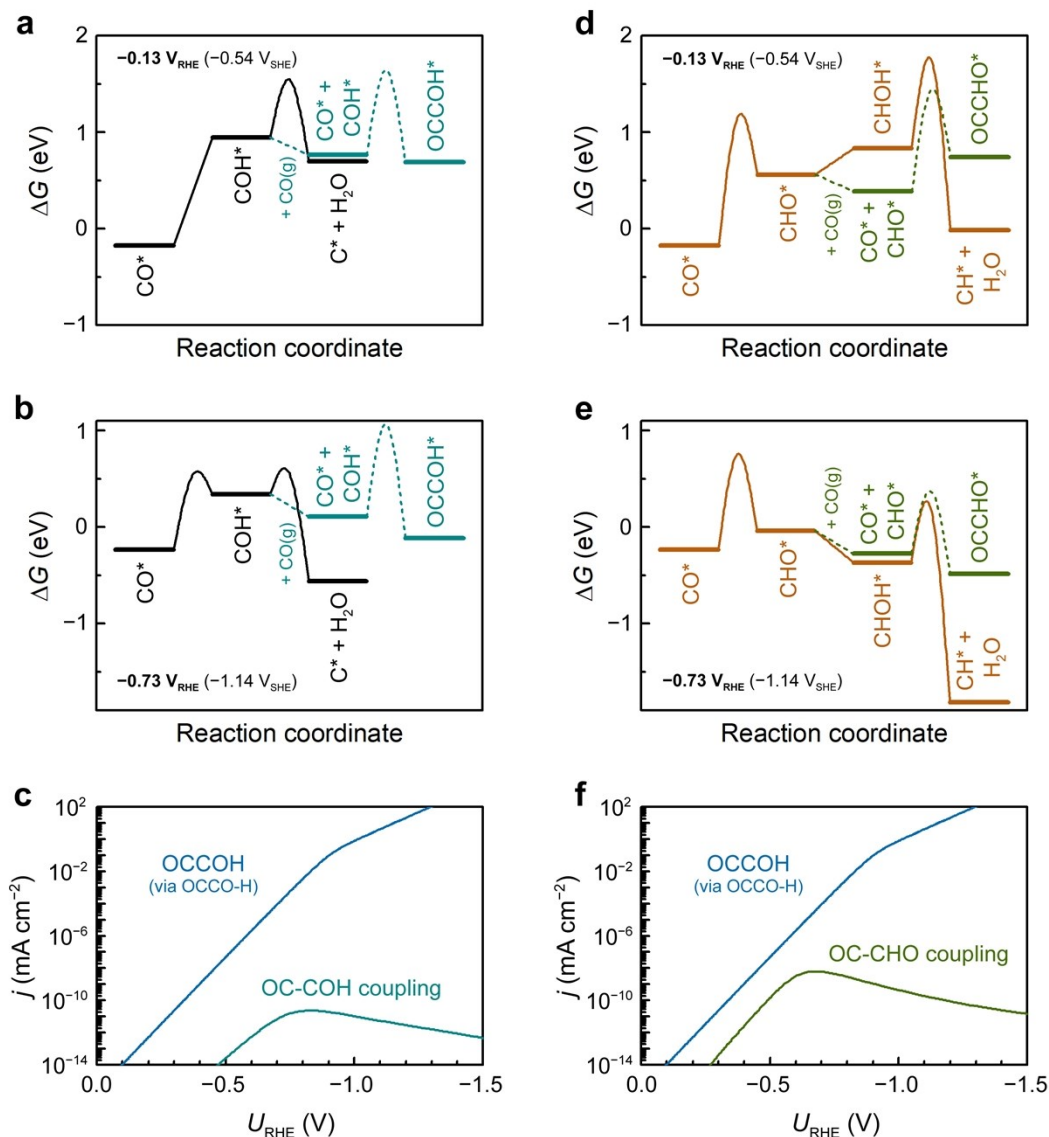

**Figure S11. Other early coupling pathways in comparison with OCCOH under COR conditions at pH = 7.** FEDs of the OC-COH pathway in comparison with the competing reduction pathway of  $\text{COH}^* \rightarrow \text{C}^* + \text{H}_2\text{O}$  at potentials (a)  $U_{\text{RHE}} = -0.13 \text{ V}$  and (b)  $U_{\text{RHE}} = -0.73 \text{ V}$ . (c) Simulated reaction rates of OC-COH coupling in comparison with the rate of OCCOH pathway. FEDs of the OC-CHO pathway in comparison with the competing reduction pathway of  $\text{CHO}^* \rightarrow \text{CHOH}^* \rightarrow \text{CH}^* + \text{H}_2\text{O}$  at potentials (d)  $U_{\text{RHE}} = -0.13 \text{ V}$  and (e)  $U_{\text{RHE}} = -0.73 \text{ V}$ . The OC-CHO coupling barrier (0.65 eV) at  $U_{\text{RHE}} = -0.73 \text{ V}$  is comparable to the reported values (0.65–0.70 eV at  $U_{\text{RHE}} > -0.6 \text{ V}$ ) by Goodpaster et al.<sup>42</sup> (f) Simulated reaction rates of OC-CHO coupling in comparison with the rate of OCCOH pathway. The two pathways of OC-COH and OC-CHO coupling become less competitive than the OCCOH pathway because at low overpotentials, the two pathways are mainly limited by the first protonation steps of  $\text{CO}^*$  to either  $\text{COH}^*$  or  $\text{CHO}^*$ , while at high overpotentials, the competing reduction pathways to form  $\text{C}^* + \text{H}_2\text{O}$  and  $\text{CH}^* + \text{H}_2\text{O}$  from  $\text{COH}^*$  and  $\text{CHO}^*$  become more favorable than the chemical coupling steps, respectively, leading to downward trends of OC-COH and OC-CHO coupling rates shown in (c) and (f). Nevertheless, the possibility of forming experimentally obtained minor products such as glyoxal and glycolaldehyde

from OCCHO\* as demonstrated by Garza et al.<sup>43</sup> is not excluded. But their formation rates are expected to be significantly lower than formation rates of major C<sub>2</sub> products.

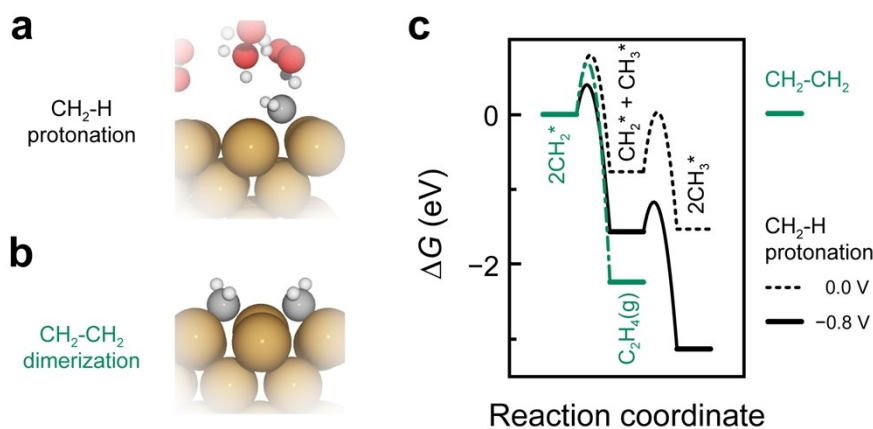

**Figure S12. The competition between CH<sub>2</sub>-CH<sub>2</sub> dimerization and CH<sub>2</sub>-H protonation on Cu(100).** Optimized atomic configurations of TS structures: (a) CH<sub>2</sub>-H protonation (CH<sub>2</sub>\* + H<sup>+</sup> + e<sup>-</sup> → CH<sub>3</sub>\*) and (b) CH<sub>2</sub>-CH<sub>2</sub> dimerization (2CH<sub>2</sub>\* → C<sub>2</sub>H<sub>4</sub>(g) + 2e<sup>-</sup>). (c) FEDs of CH<sub>2</sub>-CH<sub>2</sub> dimerization and CH<sub>2</sub>-H protonation, revealing the energetically favored CH<sub>2</sub>-H protonation at negative  $U_{\text{RHE}}$ .



## 2.2. Microkinetic model of COR and pH effects

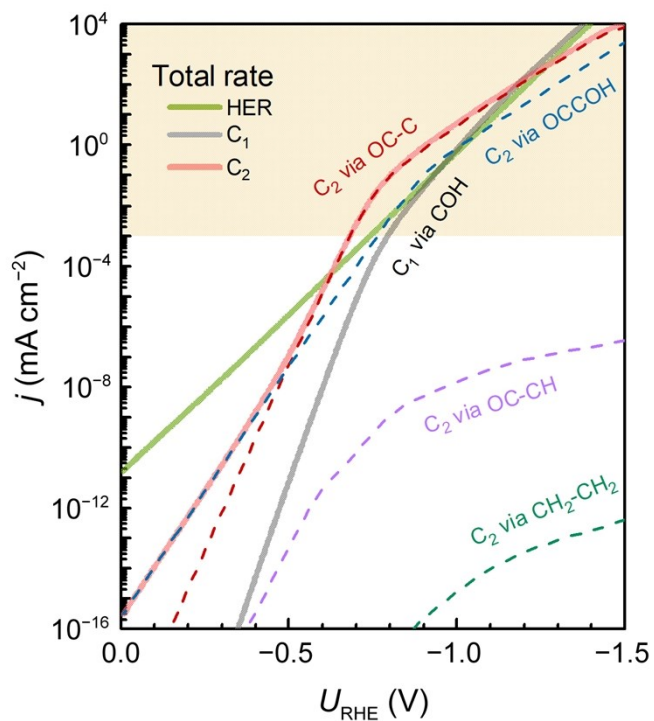

**Figure S13. Theoretical partial current densities on Cu(100) (pH = 7).** Theoretical polarization curves showing the total rates of HER, C<sub>1</sub>, and C<sub>2</sub>, as well as the partial contribution of each pathway to the current density ( $j$ ).

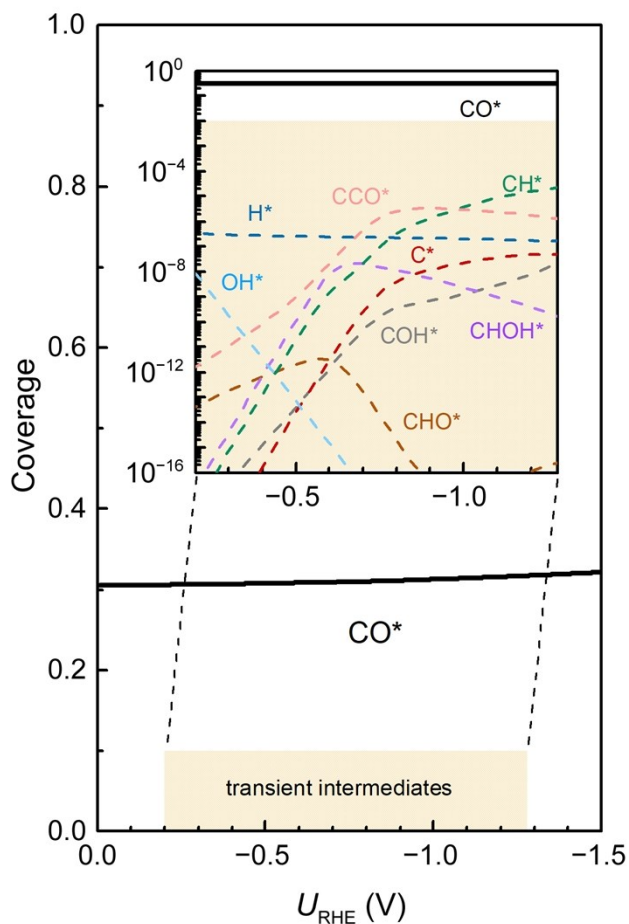

**Figure S14. Steady-state coverages of surface species on Cu(100).** The coverages of different species are plotted against potential vs. RHE at pH = 7. These coverages correspond to the model shown in **Figure 3**.  $CO^*$  is found to be the dominant surface species within a broad potential range; while  $H^*$ ,  $COH^*$ ,  $CHO^*$ ,  $C^*$ ,  $CHOH^*$ ,  $CH^*$ , and  $CCO^*$  are regarded as transient intermediates due to their rapid conversion to more reduced products at negative potentials. The low coverage of  $COH^*/CHO^*/CHOH^*$ , along with the corresponding higher coupling barrier than the protonation counterpart, limits the activity of OC-COH, OC-CHO, and OC-CHOH coupling.

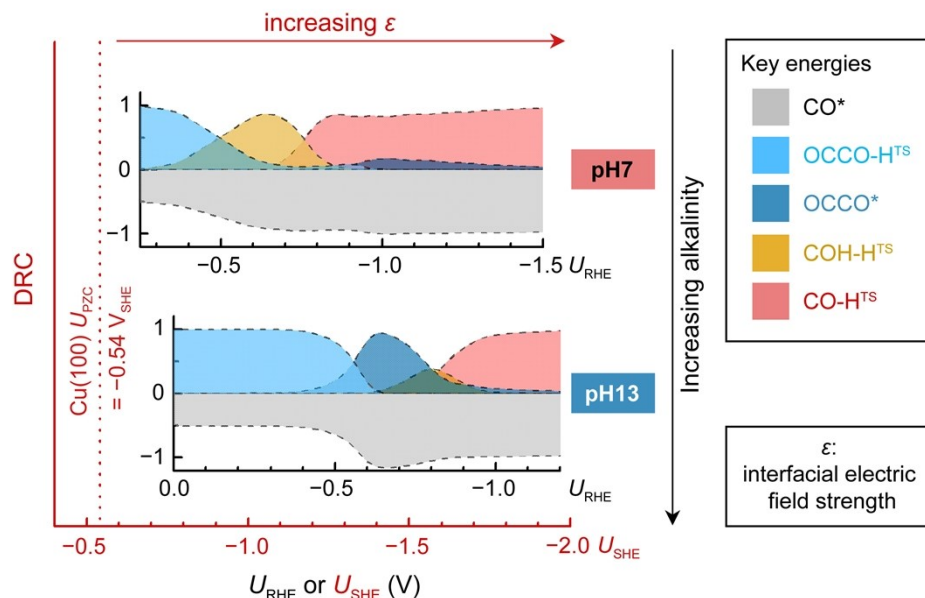

**Figure S15. Degree of rate control (DRC) analysis.** Simulated DRC of COR at bulk pH7 and bulk pH13. As conceptualized by Campbell et al.,<sup>44, 45</sup> DRC serves as a powerful tool to quantify the magnitude of rate controlling by a certain intermediate or a TS. A positive (negative) value of DRC indicates that the corresponding reaction intermediate or TS needs to be stabilized (destabilized) in order to enhance the rate. The boundary values of 1 and  $-1$  represent full rate control by the intermediates. Key intermediates and TSs are shown in light gray ( $\text{CO}^*$ ), azure ( $\text{OCCO-H}^{\text{TS}}$ ), blue ( $\text{OCCO}^*$ ), yellow ( $\text{COH-H}^{\text{TS}}$ ), and red ( $\text{CO-H}^{\text{TS}}$ ), respectively.  $\text{OCCO-H}^{\text{TS}}$ ,  $\text{COH-H}^{\text{TS}}$ , and  $\text{CO-H}^{\text{TS}}$  refer to TSs of OCCO-H, COH-H, and CO-H protonations, respectively. This figure clearly shows that the rate-determining step of COR is initially OCCO-H protonation and then changes into COH-H protonation and CO-H protonation as the potential goes negative at pH7. *Videlicet*, the dominant COR pathway shifts from the OCCOH to the COH/OC-C with increasing overpotential. At pH13, the change in RDS follows the same trend but the  $U_{\text{SHE}}$  for the pathway transition becomes more negative. If we consider the practical high local pH as illustrated in **Figures S16–S17**, the RDS in both bulk pH7 and bulk pH13 will remain as the first electron transfer step in each pathway (OCCO-H in the OCCOH pathway and CO-H in the COH/OC-C pathway). This observation is consistent with the Tafel slopes of  $\text{CO}_2\text{R}$  measured experimentally.

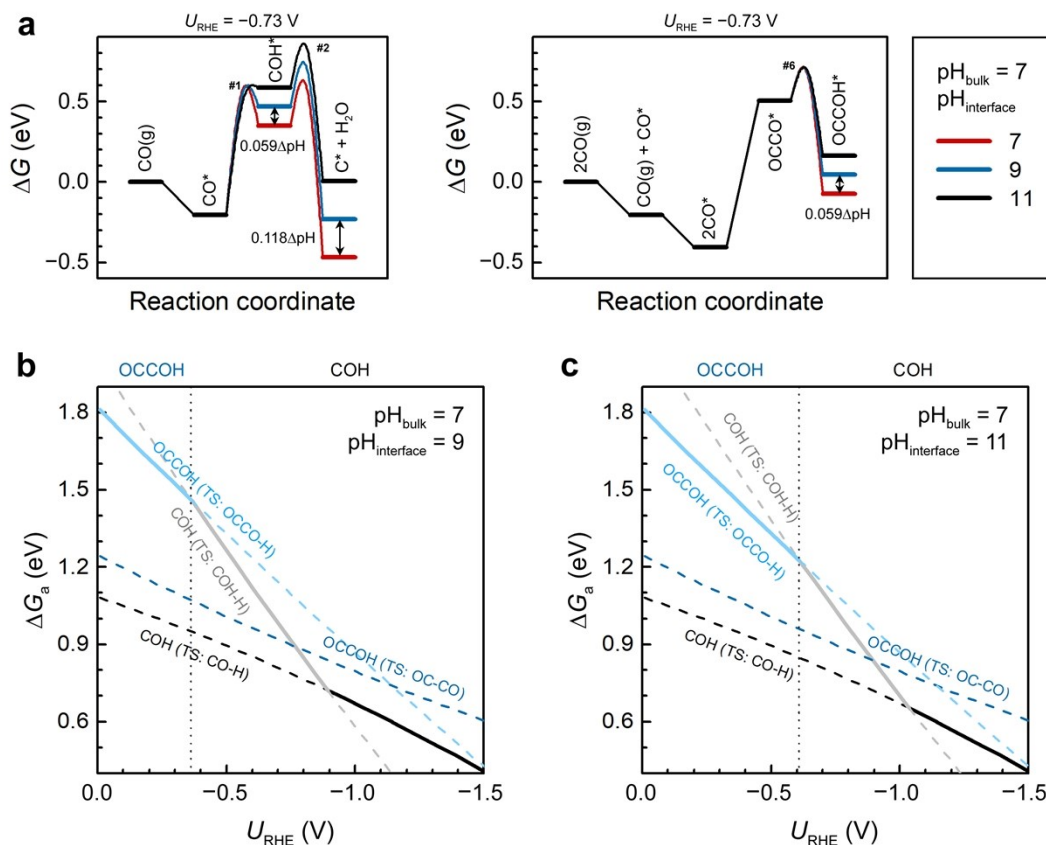

**Figure S16. Local pH ( $\text{pH}_{\text{interface}}$ ) effects on energetics of key steps.** (a) FEDs (at  $U_{\text{RHE}} = -0.73$  V) of key steps: (left) the COH pathway ( $\text{CO}^* \rightarrow \text{COH}^* \rightarrow \text{C}^* + \text{H}_2\text{O}^* \rightarrow \dots$ ); (right) the OCCOH pathway toward  $\text{C}_2$  ( $\text{CO}^* \rightarrow \text{OCCO}^* \rightarrow \text{OCCOH}^* \rightarrow \dots$ ). Various local pH conditions are referred to red ( $\text{pH}_{\text{interface}} = 7$ ), blue ( $\text{pH}_{\text{interface}} = 9$ ), and black ( $\text{pH}_{\text{interface}} = 11$ ) colors, respectively. To elucidate the pH effect on each final state of protonation step, water as the proton source is explicitly included in corresponding initial state and thus hydroxide anion ( $\text{OH}^-$ ) is present in the final state. According a previous study (also elucidated in **Supplementary Note 5** and **Figure S4**),<sup>9</sup> the electrochemical barrier ( $\Delta G_{\text{a}}$ ) of alkaline protonation steps is dependent on the  $U_{\text{SHE}}$  while reaction energy ( $\Delta G_{\text{rxn}}$ ) is  $U_{\text{RHE}}$ -dependent. Taking CO-H protonation to form  $\text{COH}^*$  as an example, the red and blue profiles show the same  $\Delta G_{\text{a}}$  since they are collected at the same bulk pH of 7 and the absolute potential at the working electrode is measured from the reference electrode contacting with the pH-buffered bulk electrolyte ( $\text{pH}_{\text{bulk}} = 7$ ); in contrast, the blue profile shows a higher final state by an amount of  $0.059\Delta\text{pH}$  ( $\Delta\text{pH} = 9 - 7 = 2$ ) due to the higher  $\text{OH}^-$  concentration than that of the neutral condition (the red one). Comparison between the OCCOH and COH pathways under COR conditions at (b)  $\text{pH}_{\text{interface}} = 9$  and (c)  $\text{pH}_{\text{interface}} = 11$ , respectively. The definition of  $\Delta G_{\text{a}}$  for each pathway is shown to be: (black) COH (TS: CO-H):  $G_{\text{TS: CO-H}} - G_{\text{CO}^*}$ ; (gray) COH (TS: COH-H):  $G_{\text{TS: COH-H}} - G_{\text{CO}^*}$ ; (blue) OCCOH (TS: OC-CO):  $G_{\text{OCCO}^*} - 2G_{\text{CO}^*}$ ; (azure) OCCOH (TS: OCCO-H):  $G_{\text{TS: OCCO-H}} - 2G_{\text{CO}^*}$ .

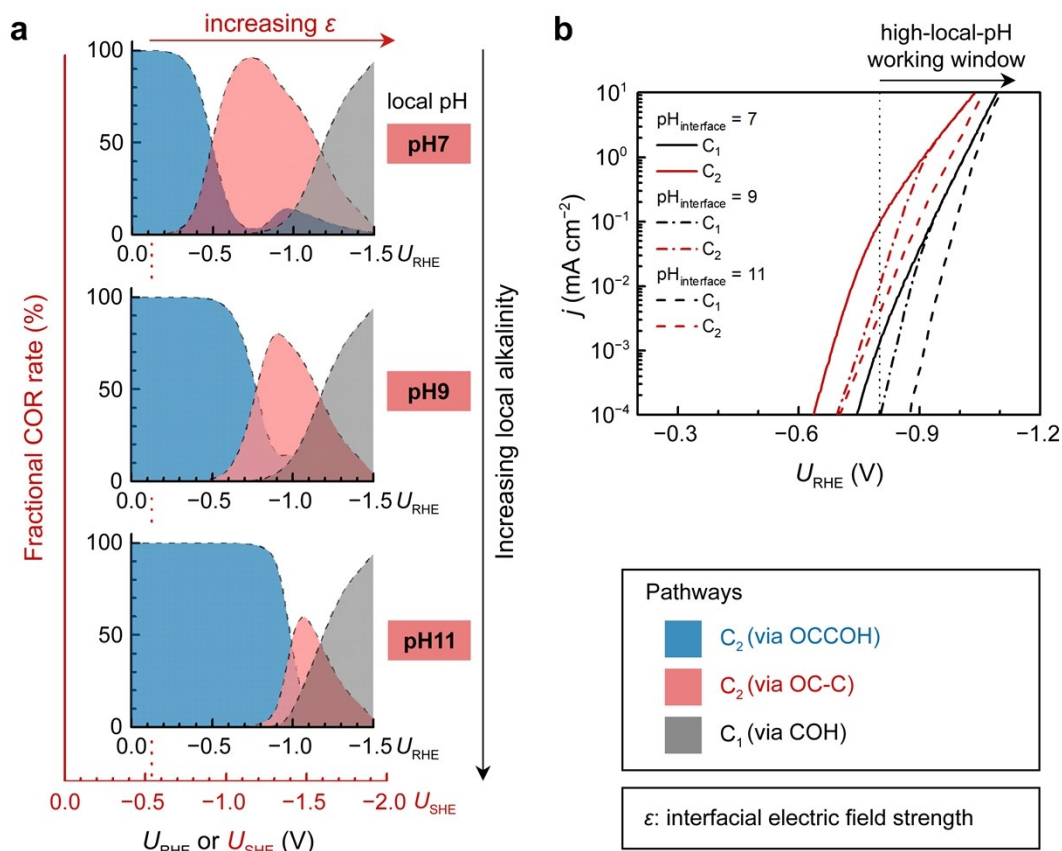

**Figure S17. Product distributions and polarization curves of  $\text{CO}_2\text{R}$  on Cu(100) in bulk neutral electrolyte ( $\text{pH}_{\text{bulk}} = 7$ ) under different local pH ( $\text{pH}_{\text{interface}}$ ) conditions. (a) Fractional COR rates (by normalizing to the total COR rate) from three pathways; OCCOH to  $C_2$ , OC-C to  $C_2$ , and COH to  $C_1$ . Pathways are shown in blue, red, and gray, respectively. Different  $\text{pH}_{\text{interface}}$  conditions are considered with  $\text{pH}_{\text{interface}}$  varying from 7 to 9, and to 11. The local alkalinity increases from top to the bottom. (b) Theoretical polarization curves.  $U_{RHE} < -0.8$  V was suggested as the major potential window where high current density of  $> 10^2$   $\text{mA cm}^{-2}$  was obtained and a high local pH was induced.<sup>46, 47</sup>**

### 2.3. Selectivity maps with $G_{\text{CO}^*}$ and $G_{\text{C}^*}$ as descriptors

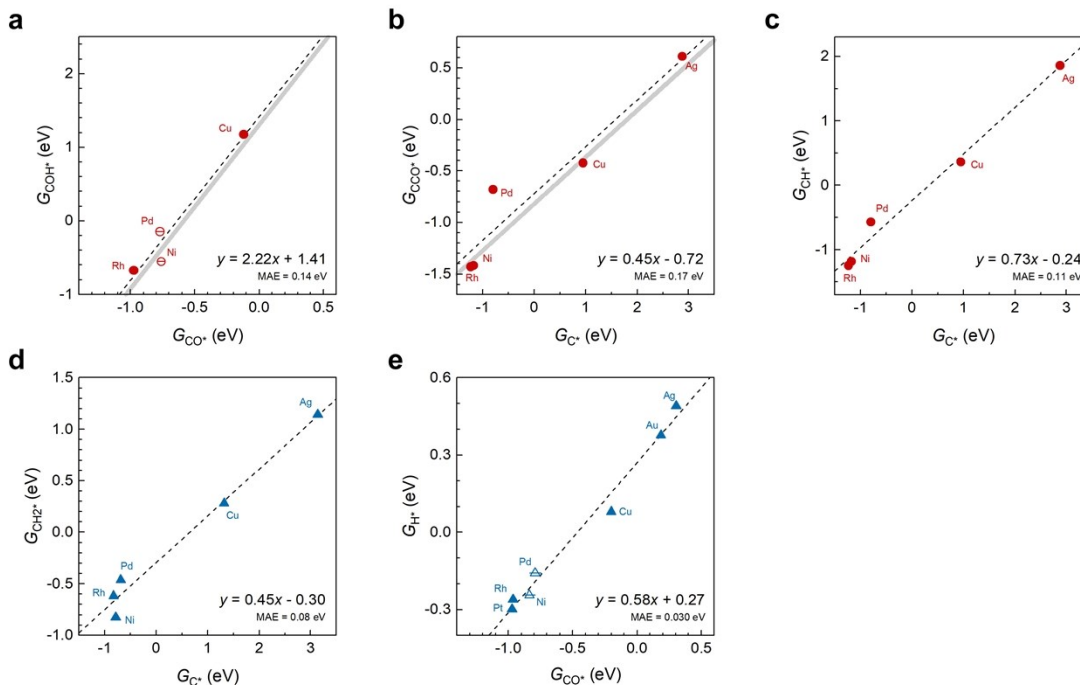

**Figure S18. (100) and (211) energetic scaling lines with descriptors of  $G_{\text{CO}^*}$  and  $G_{\text{C}^*}$ .** (a)  $G_{\text{COH}^*}$ , (b)  $G_{\text{CCO}^*}$ , (c)  $G_{\text{CH}^*}$ , (d)  $G_{\text{CH}_2^*}$ , and (e)  $G_{\text{H}^*}$ . These scaling lines were used to construct **Figure 6** and **Figures S19, S20**. The strongest adsorption sites were generally adopted: (211) step bridge (sbr) site for  $\text{H}^*$  and  $\text{CH}_2^*$ ; (100) four-fold hollow site for  $\text{C}^*$ ,  $\text{COH}^*$ ,  $\text{CCO}^*$ , and  $\text{CH}^*$ . The adsorption site for  $\text{CO}^*$  depends on the metal: for Ag, Au, Cu, Pt, and Rh, ontop site on both (211) and (100) surfaces; for Pd and Ni, bridge site on the two surfaces. The blue color indicates the (211) scaling lines while the red color indicates the (100) scaling lines. Note that the  $5d$  metals Au and Pt, are excluded to construct the (100) scaling lines as their strongest binding sites for  $\text{COH}^*$  and  $\text{CH}^*$  are the (111) *hcp* hollow sites. Besides, the Ag(100) is excluded for constructing these scaling lines using  $G_{\text{CO}^*}$  as the descriptor because Ag(100) do not adsorb CO. The light grey lines in **a** and **b** show the solvation effects on adsorption energies of  $\text{COH}^*$  and  $\text{CCO}^*$ .

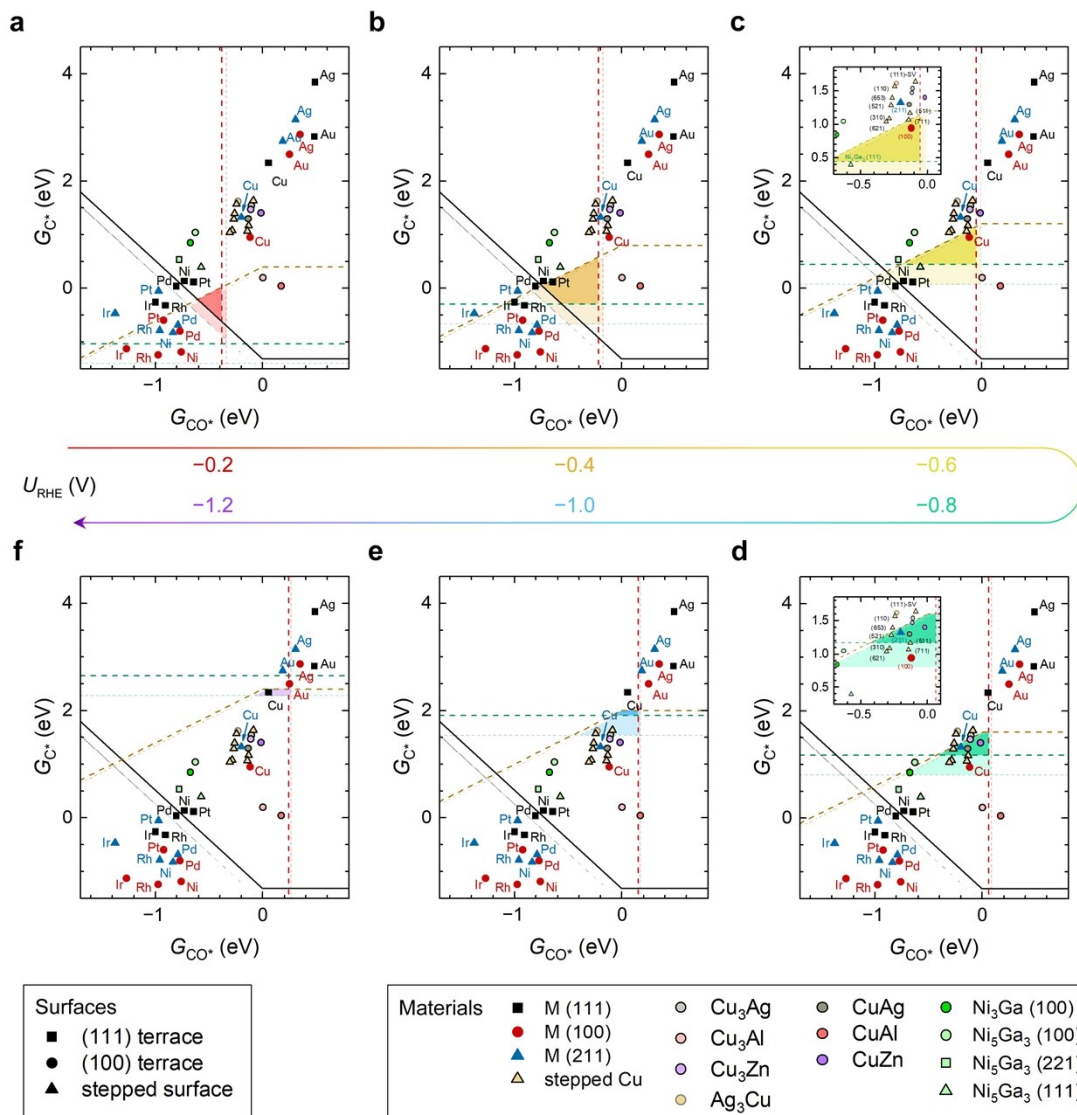

**Figure S19.** ( $G_{\text{CO}^*}$ ,  $G_{\text{C}^*}$ ) selectivity maps toward  $\text{C}_2$  products.  $\text{C}_2$ -selective regions are highlighted at various potentials. Similar to **Figure 6**, the light colors refer to solvation-corrected energetics. Various metallic and intermetallic systems are shown with their denoted symbols as indicated in the Materials legend and the denoted symbols for their surface structures are indicated in the Surfaces legend. Boundary lines are shown as dashed lines for electrochemically driven processes, or solid lines for the potential-independent C-CO coupling process. The thermodynamic boundaries are exactly the same as in **Figure 6** and the  $U$  in the equations is referenced to RHE. These maps could rationalize several experimental observations:

- Ni-Ga intermetallics (especially the stepped  $\text{Ni}_5\text{Ga}_3$  (111) surface) are suggested to produce  $\text{C}_{2+}$  products within a  $U_{\text{RHE}}$  window of  $-0.5$  V to  $-0.7$  V (estimated from **(b)**–**(d)**), which is in good accordance with the experiments by Lewis and coworkers.<sup>48</sup>
- The intermetallic compounds such as  $\text{Cu}_3\text{Ag}$ ,  $\text{CuAg}$ ,  $\text{Cu}_3\text{Zn}$ , and  $\text{CuZn}$  are also predicted to possess comparable  $\text{C}_2$  selectivity to pure Cu within an estimated  $U_{\text{RHE}}$  window of  $-0.7$  V to  $-0.9$  V (**(c)**–**(e)**). These compounds (in the same or similar composition) have been validated in recent experimental advances<sup>49–52</sup> to show comparable or enhanced  $\text{C}_{2+}$  production from  $\text{CO}_{(2)}$ .
- The comparison between Cu(111) and Cu(111)-SV (inset in **(d)**) could serve as a rough



explanation why defects on close-packed Cu surfaces to create binding sites that stabilize the key intermediate of  $C^*$  and so allows  $C_1/C_2$  production at lower overpotential than Cu(111). In a recent work on quantum-dot derived Cu nanoparticles, Liu et al. explicitly observed single vacancy on (111) surfaces and demonstrated the enhanced  $C_2$  selectivity on such material.<sup>53</sup> Our theoretical model exactly agrees with their experiments.

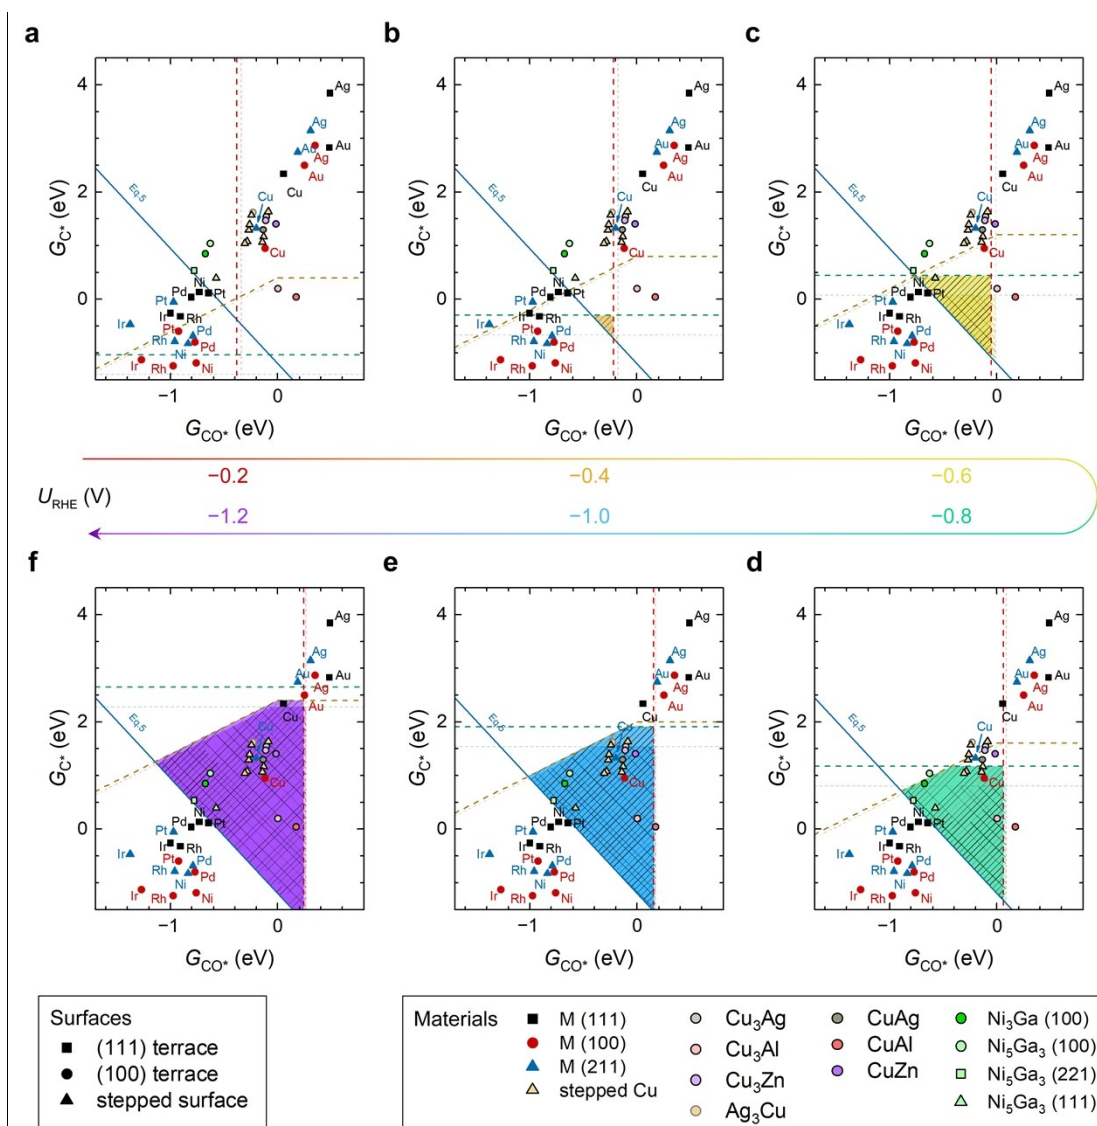

**Figure S20.** ( $G_{CO^*}$ ,  $G_{C^*}$ ) selectivity maps toward  $C_1$  ( $CH_4$ ) products.  $C_1$ -selective regions are highlighted at various potentials. Similar to **Figure 6**, the light-color regions with right slashes refer to solvation-corrected energetics; while the dark-color regions with left slashes refer to vacuum-level energetics. Various metallic and intermetallic systems are shown with their denoted symbols as indicated in the Materials legend and the denoted symbols for their surface structures are indicated in the Surfaces legend. Boundary lines are shown as dashed lines for electrochemically driven processes. The potential-dependent thermodynamic boundaries are exactly the same as in **Figure 6** and the  $U$  in the equations is referenced to RHE, but the independent boundary (the solid line) changes Eq. 3 (C-CO coupling vs. CO adsorption) to Eq. 5 (CH protonation to Volmer). The Eq. 5 is expressed as  $G_{CH^*} + G_{H^*} = G_{CH_2^*}$ , which is the thermal-neutral condition for CH protonation



( $\text{CH}^* + \text{H}^+ + \text{e}^- \rightarrow \text{CH}_2^*$ ) and the Volmer ( $\text{H}^+ + \text{e}^- + * \rightarrow \text{H}^*$ ). Strong binding metals possess more negative ( $G_{\text{CH}^*} + G_{\text{H}^*}$ ) than  $G_{\text{CH}_2^*}$  and thus are prone to catalyze HER over  $\text{CH}_4$  production. The closer are materials in the  $\text{C}_1$ -selective regions to the thermodynamic boundaries of Eq. 5, the more dominant HER will be observed. These maps could rationalize several experimental observations:

- Despite the minor hydrocarbon production on Ni-Ga intermetallics (especially the stepped  $\text{Ni}_5\text{Ga}_3$  (111) surface), terrace-like  $\text{Ni}_5\text{Ga}_3$  (221) surface is quite close to the thermodynamic boundary of Eq. 5 and thus HER will be quite dominant, which is in good accordance with the observed experimental phenomena: more than 90% FE for HER.<sup>48</sup>
- Unlike Cu-rich intermetallic compounds, Ag electrodes modified by a small amount of Cu (less than 50% surface coverage and thus exemplified as a Cu-poor intermetallic of  $\text{Ag}_3\text{Cu}$ ) were demonstrated for selective  $\text{CH}_4$  production at  $U_{\text{RHE}} < -1.1$  V,<sup>54</sup> which is exactly rationalized by our model ((e)–(f)).

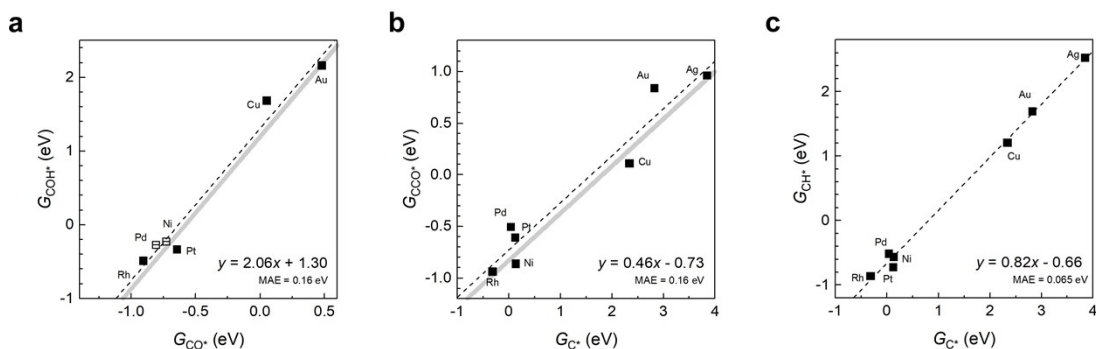

**Figure S21. (111) energetic scaling lines with descriptors of  $G_{\text{CO}^*}$  and  $G_{\text{C}^*}$ .** (a)  $G_{\text{COH}^*}$ , (b)  $G_{\text{CCO}^*}$ , and (c)  $G_{\text{CH}^*}$ . These scaling lines were used to construct Figure S22. The adsorption site for  $\text{CO}^*$  depends on the metal: for Ag, Au, Cu, Pt, and Rh, ontop site; for Pd and Ni, *hcp* hollow site. The Ag(111) is excluded for constructing these scaling lines using  $G_{\text{CO}^*}$  as the descriptor because Ag(111) do not adsorb CO. The light grey lines in a and b show the solvation effects on adsorption energies of  $\text{COH}^*$  and  $\text{CCO}^*$ .

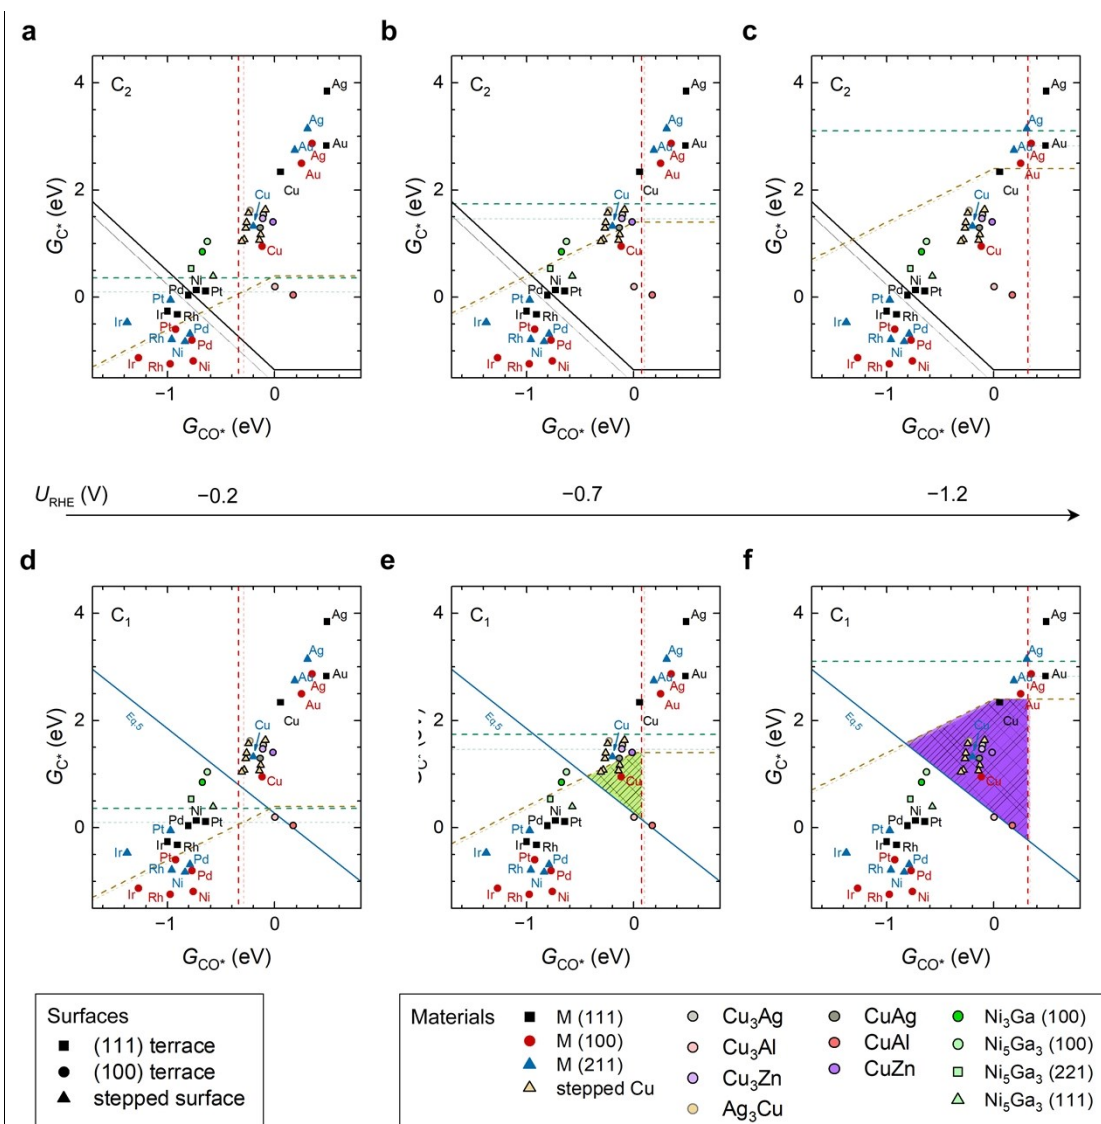

**Figure S22.** ( $G_{\text{CO}^*}$ ,  $G_{\text{C}^*}$ ) selectivity maps based on (111) energetic scaling lines. (a–c)  $\text{C}_2$  selectivity at varying potentials. (d–f)  $\text{C}_1$  selectivity at varying potentials. All the details are the same as in **Figures S19, S20** but the thermodynamic boundaries were constructed based on (111) energetic scaling lines. Specifically, the (100) energetic scaling lines shown in **Figure S18a–c** were replaced by the (111) energetic scaling lines shown in **Figure S21a–c**. The comparison between these maps with **Figures S19, S20** clearly show the significant shift of thermodynamic boundary defined by Eq. 4 (CCO formation vs. CH formation). This shift renders three-fold hollow site a poor catalytic site motif for selective  $\text{C}_2$  production. Thus, engineering four-fold hollow site becomes a key criterion for  $\text{C}_2$ -selective catalyst design.

### 3. Supplementary References

1. P. Giannozzi, S. Baroni, N. Bonini, M. Calandra, R. Car, C. Cavazzoni, D. Ceresoli, G. L. Chiarotti, M. Cococcioni, I. Dabo, A. Dal Corso, S. de Gironcoli, S. Fabris, G. Fratesi, R. Gebauer, U. Gerstmann, C. Gougoussis, A. Kokalj, M. Lazzeri, L. Martin-Samos, N. Marzari, F. Mauri, R. Mazzarello, S. Paolini, A. Pasquarello, L. Paulatto, C. Sbraccia, S. Scandolo, G. Sclauzero, A. P. Seitsonen, A. Smogunov, P. Umari and R. M. Wentzcovitch, *J. Phys-Condens. Mat.*, 2009, **21**, 395502.
2. S. R. Bahn and K. W. Jacobsen, *Computing in Science & Engineering*, 2002, **4**, 56-66.
3. J. Wellendorff, K. T. Lundgaard, A. Mogelhoff, V. Petzold, D. D. Landis, J. K. Nørskov, T. Bligaard and K. W. Jacobsen, *Phys. Rev. B*, 2012, **85**, 235149.
4. H. J. Monkhorst and J. D. Pack, *Phys. Rev. B*, 1976, **13**, 5188-5192.
5. Z. W. Ulissi, M. T. Tang, J. P. Xiao, X. Y. Liu, D. A. Torelli, M. Karamad, K. Cummins, C. Hahn, N. S. Lewis, T. F. Jaramillo, K. R. Chan and J. K. Nørskov, *ACS Catal.*, 2017, **7**, 6600-6608.
6. M. T. Tang, Z. W. Ulissi and K. R. Chan, *J. Phys. Chem. C*, 2018, **122**, 14481-14487.
7. A. A. Peterson, F. Abild-Pedersen, F. Studt, J. Rossmeisl and J. K. Nørskov, *Energy Environ. Sci.*, 2010, **3**, 1311-1315.
8. Y. Hori, A. Murata and R. Takahashi, *Journal of the Chemical Society-Faraday Transactions I*, 1989, **85**, 2309-2326.
9. X. Y. Liu, P. Schlexer, J. P. Xiao, Y. F. Ji, L. Wang, R. B. Sandberg, M. Tang, K. S. Brown, H. J. Peng, S. Ringe, C. Hahn, T. F. Jaramillo, J. K. Nørskov and K. R. Chan, *Nat. Commun.*, 2019, **10**, 32.
10. T. Ludwig, J. A. Gauthier, K. S. Brown, S. Ringe, J. K. Nørskov and K. Chan, *J. Phys. Chem. C*, 2019, **123**, 5999-6009.
11. J. H. Montoya, C. Shi, K. Chan and J. K. Nørskov, *J. Phys. Chem. Lett.*, 2015, **6**, 2032-2037.
12. J. K. Nørskov, F. Studt, F. Abild-Pedersen and T. Bligaard, *Fundamental Concepts in Heterogeneous Catalysis*, 2014.
13. K. Jiang, R. B. Sandberg, A. J. Akey, X. Y. Liu, D. C. Bell, J. K. Nørskov, K. R. Chan and H. T. Wang, *Nat. Catal.*, 2018, **1**, 111-119.
14. S. Ringe, E. L. Clark, J. Resasco, A. Walton, B. Seger, A. T. Bell and K. Chan, *Energy Environ. Sci.*, 2019, **12**, 3001-3014.
15. D. C. Grahame, *Chem. Rev.*, 1947, **41**, 441-501.
16. J. A. Gauthier, C. F. Dickens, H. H. Heenen, S. Vijay, S. Ringe and K. Chan, *Journal of Chemical Theory and Computation*, 2019, **15**, 6895-6906.
17. S. Trasatti and E. Lust, *Modern Aspects of Electrochemistry*, Springer, 2002.
18. E. Skulason, V. Tripkovic, M. E. Bjorketun, S. Gudmundsdottir, G. Karlberg, J. Rossmeisl, T. Bligaard, H. Jonsson and J. K. Nørskov, *J. Phys. Chem. C*, 2010, **114**, 18182-18197.
19. S. Ringe, C. G. Morales-Guio, L. D. Chen, M. Fields, T. F. Jaramillo, C. Hahn and K. Chan, *Nat. Commun.*, 2020, **11**, 33.
20. J. K. Nørskov, J. Rossmeisl, A. Logadottir, L. Lindqvist, J. R. Kitchin, T. Bligaard and H. Jonsson, *J. Phys. Chem. B*, 2004, **108**, 17886-17892.

21. C. Shi, K. Chan, J. S. Yoo and J. K. Nørskov, *Org. Process. Res. Dev.*, 2016, **20**, 1424-1430.
22. J. Resasco, L. D. Chen, E. Clark, C. Tsai, C. Hahn, T. F. Jaramillo, K. Chan and A. T. Bell, *J. Am. Chem. Soc.*, 2017, **139**, 11277-11287.
23. E. L. Clark, S. Ringe, M. Tang, A. Walton, C. Hahn, T. F. Jaramillo, K. Chan and A. T. Bell, *ACS Catal.*, 2019, **9**, 4006-4014.
24. G. Henkelman, B. P. Uberuaga and H. Jonsson, *J. Chem. Phys.*, 2000, **113**, 9901-9904.
25. B. Hammer, Challenges with the currently(correctly) implemented NEB-method. Should ASE revert to the original more robust NEB-formulation with springs?, <https://wiki.fysik.dtu.dk/gpaw-files/workshop13/a08.pdf>, (accessed Oct. 2016).
26. K. Chan and J. K. Nørskov, *J. Phys. Chem. Lett.*, 2015, **6**, 2663-2668.
27. K. Chan and J. K. Nørskov, *J. Phys. Chem. Lett.*, 2016, **7**, 1686-1690.
28. S. Trasatti, *Pure Appl. Chem.*, 1986, **58**, 955-966.
29. D. Strmcnik, M. Uchimura, C. Wang, R. Subbaraman, N. Danilovic, D. van der Vliet, A. P. Paulikas, V. R. Stamenkovic and N. M. Markovic, *Nat. Chem.*, 2013, **5**, 300-306.
30. P. S. Lamoureux, A. R. Singh and K. R. Chan, *ACS Catal.*, 2019, **9**, 6194-6201.
31. L. Wang, S. A. Nitopi, E. Bertheussen, M. Orazov, C. G. Morales-Guio, X. Y. Liu, D. C. Higgins, K. R. Chan, J. K. Nørskov, C. Hahn and T. F. Jaramillo, *ACS Catal.*, 2018, **8**, 7445-7454.
32. T. J. Schmidt, P. N. Ross and N. M. Markovic, *J. Electroanal. Chem.*, 2002, **524**, 252-260.
33. N. M. Markovic, B. N. Grgur and P. N. Ross, *J. Phys. Chem. B*, 1997, **101**, 5405-5413.
34. A. J. Medford, C. Shi, M. J. Hoffmann, A. C. Lausche, S. R. Fitzgibbon, T. Bligaard and J. K. Nørskov, *Catal. Lett.*, 2015, **145**, 794-807.
35. A. C. Lausche, A. J. Medford, T. S. Khan, Y. Xu, T. Bligaard, F. Abild-Pedersen, J. K. Nørskov and F. Studt, *J. Catal.*, 2013, **307**, 275-282.
36. N. Y. Yang, A. J. Medford, X. Y. Liu, F. Studt, T. Bligaard, S. F. Bent and J. K. Nørskov, *J. Am. Chem. Soc.*, 2016, **138**, 3705-3714.
37. F. Abild-Pedersen and M. P. Andersson, *Surf. Sci.*, 2007, **601**, 1747-1753.
38. K. T. Winther, M. J. Hoffmann, J. R. Boes, O. Mamun, M. Bajdich and T. Bligaard, *Scientific Data*, 2019, **6**, 75.
39. X. Y. Liu, J. P. Xiao, H. J. Peng, X. Hong, K. Chan and J. K. Nørskov, *Nat. Commun.*, 2017, **8**, 15438.
40. P. W. Atkins, *Physical Chemistry*, Oxford University Press, Oxford, 1990.
41. G. Ertl, *Surf. Sci.*, 1994, **299**, 742-754.
42. J. D. Goodpaster, A. T. Bell and M. Head-Gordon, *J. Phys. Chem. Lett.*, 2016, **7**, 1471-1477.
43. A. J. Garza, A. T. Bell and M. Head-Gordon, *ACS Catal.*, 2018, **8**, 1490-1499.
44. C. T. Campbell, *Top. Catal.*, 1994, **1**, 353-366.
45. C. T. Campbell, *ACS Catal.*, 2017, **7**, 2770-2779.
46. J. J. Lv, M. Jouny, W. Luc, W. L. Zhu, J. J. Zhu and F. Jiao, *Adv. Mater.*, 2018, **30**, 1803111.
47. K. L. Yang, R. Kas and W. A. Smith, *J. Am. Chem. Soc.*, 2019, **141**, 15891-15900.

48. D. A. Torelli, S. A. Francis, J. C. Crompton, A. Javier, J. R. Thompson, B. S. Brunshwig, M. P. Soriaga and N. S. Lewis, *ACS Catal.*, 2016, **6**, 2100-2104.
49. E. L. Clark, C. Hahn, T. F. Jaramillo and A. T. Bell, *J. Am. Chem. Soc.*, 2017, **139**, 15848-15857.
50. Y. G. C. Li, Z. Y. Wang, T. G. Yuan, D. H. Nam, M. C. Luo, J. Wicks, B. Chen, J. Li, F. W. Li, F. P. G. de Arguer, Y. Wang, C. T. Dinh, O. Voznyy, D. Sinton and E. H. Sargent, *J. Am. Chem. Soc.*, 2019, **141**, 8584-8591.
51. D. Ren, B. S. H. Ang and B. S. Yeo, *ACS Catal.*, 2016, **6**, 8239-8247.
52. D. Ren, J. Gao, L. F. Pan, Z. W. Wang, J. S. Luo, S. M. Zakeeruddin, A. Hagfeldt and M. Gratzel, *Angew. Chem. Int. Ed.*, 2019, **58**, 15036-15040.
53. M. Liu, M. X. Liu, X. M. Wang, S. M. Kozlov, Z. Cao, P. De Luna, H. M. Li, X. Q. Qiu, K. Liu, J. H. Hu, C. K. Jia, P. Wang, H. M. Zhou, J. He, M. Zhong, X. Z. Lan, Y. S. Zhou, Z. Q. Wang, J. Li, A. Seifitokaldani, C. T. Dinh, H. Y. Liang, C. Q. Zou, D. L. Zhang, Y. Yang, T. S. Chan, Y. Han, L. Cavallo, T. K. Sham, B. J. Hwang and E. H. Sargent, *Joule*, 2019, **3**, 1703-1718.
54. H. C. Zhang, X. X. Chang, J. G. G. Chen, W. A. Goddard, B. J. Xu, M. J. Cheng and Q. Lu, *Nat. Commun.*, 2019, **10**, 3340.
